# Supplementary material for: Single source heterobimetallic precursors for the deposition of Cu–Ti mixed metal oxide thin films
Source: Royal Society of Chemistry journal article supplement (doi:10.1039/b712031a), 2008-01-01
Supplement: b712031a.pdf [file b712031a.pdf]

## Numerical data for Complex 1

Table 2. Atomic coordinates [ $\times 10^4$ ] and equivalent isotropic displacement parameters [ $\text{\AA}^2 \times 10^3$ ] for 06mz171m. U(eq) is defined as one third of the trace of the orthogonalized  $U_{ij}$  tensor.

|        | x        | y        | z         | U(eq) |
|--------|----------|----------|-----------|-------|
| C(1A)  | 5922(3)  | 3236(3)  | 793(2)    | 28(1) |
| C(2A)  | 5077(3)  | 3529(3)  | 659(2)    | 26(1) |
| C(3A)  | 4888(3)  | 3940(3)  | 177(2)    | 38(1) |
| C(4A)  | 4103(3)  | 4195(3)  | 42(3)     | 49(2) |
| C(5A)  | 3508(3)  | 4017(3)  | 369(3)    | 53(2) |
| C(6A)  | 3683(3)  | 3599(3)  | 844(3)    | 48(1) |
| C(7A)  | 4471(3)  | 3362(3)  | 992(2)    | 37(1) |
| C(8A)  | 8356(6)  | 4101(5)  | 1418(6)   | 18(2) |
| C(9A)  | 7998(5)  | 4444(4)  | 857(3)    | 29(2) |
| C(10A) | 9044(5)  | 3985(5)  | 219(5)    | 32(2) |
| C(11A) | 7658(6)  | 4144(5)  | -282(4)   | 32(2) |
| C(8Z)  | 8107(12) | 4101(8)  | 1454(9)   | 18(2) |
| C(9Z)  | 8600(7)  | 4365(7)  | 996(4)    | 33(3) |
| C(10Z) | 9014(8)  | 3696(9)  | 40(7)     | 32(2) |
| C(11Z) | 7744(9)  | 4397(8)  | -32(6)    | 32(2) |
| C(1B)  | 6434(3)  | 426(3)   | 935(2)    | 29(1) |
| C(2B)  | 5814(3)  | -286(3)  | 783(2)    | 32(1) |
| C(3B)  | 5026(3)  | -200(3)  | 884(3)    | 60(2) |
| C(4B)  | 4448(4)  | -843(4)  | 765(3)    | 68(2) |
| C(5B)  | 4655(3)  | -1600(4) | 539(2)    | 49(2) |
| C(6B)  | 5437(4)  | -1696(4) | 429(3)    | 70(2) |
| C(7B)  | 6008(3)  | -1036(3) | 542(3)    | 56(2) |
| C(8B)  | 7993(3)  | 1700(3)  | 2371(2)   | 32(1) |
| C(9B)  | 7650(3)  | 2349(3)  | 2795(2)   | 37(1) |
| C(10B) | 6921(3)  | 3512(3)  | 2643(2)   | 45(1) |
| C(11B) | 6135(3)  | 2250(3)  | 2513(2)   | 41(1) |
| C(1)   | 7673(9)  | 1784(9)  | -813(6)   | 35(2) |
| C(2)   | 7504(13) | 1609(8)  | -1500(7)  | 40(2) |
| C(3)   | 6752(12) | 1783(10) | -1818(10) | 57(2) |
| C(4)   | 6574(11) | 1596(11) | -2478(10) | 73(4) |
| C(5)   | 7148(15) | 1235(11) | -2821(7)  | 88(5) |
| C(6)   | 7901(14) | 1061(11) | -2504(9)  | 70(3) |
| C(7)   | 8079(12) | 1247(11) | -1843(9)  | 40(2) |
| C(1C)  | 7853(6)  | 2127(5)  | -886(4)   | 35(2) |
| C(2C)  | 7519(8)  | 1710(5)  | -1582(4)  | 40(2) |
| C(3C)  | 6669(7)  | 1588(6)  | -1798(6)  | 57(2) |
| C(4C)  | 6359(7)  | 1210(7)  | -2426(6)  | 73(4) |
| C(5C)  | 6900(9)  | 954(6)   | -2838(4)  | 88(5) |
| C(6C)  | 7750(8)  | 1076(6)  | -2622(5)  | 70(3) |
| C(7C)  | 8060(7)  | 1453(6)  | -1994(5)  | 40(2) |
| C(8C)  | 9527(3)  | 1465(3)  | 566(2)    | 34(1) |
| C(9C)  | 9640(3)  | 724(3)   | 826(2)    | 33(1) |
| C(10C) | 8801(3)  | -138(3)  | 1283(2)   | 46(1) |

|         |           |           |           |         |
|---------|-----------|-----------|-----------|---------|
| C (11C) | 8611 (3)  | -299 (3)  | 132 (2)   | 39 (1)  |
| C (1D)  | 9137 (3)  | 5426 (3)  | 2958 (2)  | 24 (1)  |
| C (2D)  | 8384 (3)  | 5850 (3)  | 3072 (2)  | 32 (1)  |
| C (3D)  | 8314 (4)  | 6603 (4)  | 2935 (3)  | 76 (2)  |
| C (4D)  | 7674 (5)  | 7049 (5)  | 3081 (4)  | 110 (3) |
| C (5D)  | 7058 (5)  | 6738 (5)  | 3352 (4)  | 97 (3)  |
| C (6D)  | 7119 (3)  | 5988 (4)  | 3471 (3)  | 53 (2)  |
| C (7D)  | 7793 (3)  | 5577 (3)  | 3361 (2)  | 32 (1)  |
| C (8D)  | 11263 (3) | 5289 (3)  | 1405 (2)  | 40 (1)  |
| C (9D)  | 11135 (4) | 6154 (3)  | 1686 (2)  | 47 (1)  |
| C (10D) | 12226 (3) | 6396 (3)  | 2637 (2)  | 42 (1)  |
| C (11D) | 10945 (3) | 7012 (3)  | 2685 (3)  | 45 (1)  |
| C (1E)  | 10038 (3) | 1064 (3)  | 3374 (2)  | 29 (1)  |
| C (2E)  | 9805 (3)  | 217 (3)   | 3365 (2)  | 41 (1)  |
| C (3E)  | 9476 (4)  | 29 (4)    | 3870 (3)  | 71 (2)  |
| C (4E)  | 9292 (6)  | -750 (5)  | 3880 (4)  | 111 (3) |
| C (5E)  | 9419 (6)  | -1366 (4) | 3387 (4)  | 107 (3) |
| C (6E)  | 9723 (4)  | -1175 (4) | 2878 (3)  | 72 (2)  |
| C (7E)  | 9937 (3)  | -387 (3)  | 2879 (3)  | 42 (1)  |
| C (8E)  | 9255 (3)  | 3931 (3)  | 4411 (2)  | 28 (1)  |
| C (9E)  | 9371 (3)  | 3367 (3)  | 4863 (2)  | 37 (1)  |
| C (10E) | 10839 (3) | 3753 (3)  | 5256 (2)  | 42 (1)  |
| C (11E) | 10303 (4) | 2433 (3)  | 5227 (2)  | 50 (2)  |
| C (1F)  | 11594 (3) | 2801 (3)  | 662 (2)   | 30 (1)  |
| C (2F)  | 11604 (3) | 2814 (3)  | -23 (2)   | 41 (1)  |
| C (3F)  | 12091 (5) | 2289 (3)  | -363 (3)  | 71 (2)  |
| C (4F)  | 12149 (6) | 2295 (4)  | -974 (3)  | 93 (3)  |
| C (5F)  | 11706 (6) | 2819 (5)  | -1265 (3) | 90 (3)  |
| C (6F)  | 11216 (4) | 3351 (4)  | -953 (3)  | 69 (2)  |
| C (7F)  | 11184 (3) | 3351 (4)  | -319 (2)  | 49 (2)  |
| C (8F)  | 11836 (3) | 680 (3)   | 2132 (2)  | 36 (1)  |
| C (9F)  | 12481 (3) | 592 (3)   | 1696 (2)  | 43 (1)  |
| C (10F) | 13607 (4) | 1499 (4)  | 2386 (3)  | 74 (2)  |
| C (11F) | 13395 (4) | 1357 (4)  | 1237 (3)  | 66 (2)  |
| C (1G)  | 11319 (3) | 5181 (3)  | 3890 (2)  | 23 (1)  |
| C (2G)  | 12056 (2) | 5386 (3)  | 4427 (2)  | 26 (1)  |
| C (3G)  | 12400 (3) | 6166 (3)  | 4641 (2)  | 35 (1)  |
| C (4G)  | 13081 (3) | 6343 (4)  | 5137 (2)  | 45 (1)  |
| C (5G)  | 13425 (3) | 5754 (4)  | 5393 (3)  | 55 (2)  |
| C (6G)  | 13106 (3) | 4976 (4)  | 5161 (2)  | 53 (2)  |
| C (7G)  | 12405 (3) | 4793 (3)  | 4685 (2)  | 38 (1)  |
| C (1H)  | 12051 (3) | 2457 (3)  | 3864 (2)  | 27 (1)  |
| C (2H)  | 12947 (3) | 2661 (3)  | 4194 (2)  | 30 (1)  |
| C (3H)  | 13173 (3) | 2651 (3)  | 4827 (2)  | 37 (1)  |
| C (4H)  | 14002 (3) | 2834 (4)  | 5128 (2)  | 49 (2)  |
| C (5H)  | 14577 (3) | 3055 (4)  | 4790 (2)  | 53 (2)  |
| C (6H)  | 14351 (3) | 3078 (3)  | 4157 (2)  | 49 (2)  |
| C (7H)  | 13526 (3) | 2874 (3)  | 3864 (2)  | 42 (1)  |
| C (1I)  | 12856 (3) | 3824 (3)  | 2337 (2)  | 31 (1)  |
| C (2I)  | 13559 (3) | 4320 (3)  | 2799 (2)  | 30 (1)  |
| C (3I)  | 13393 (3) | 4927 (3)  | 3280 (2)  | 34 (1)  |
| C (4I)  | 14038 (3) | 5369 (3)  | 3722 (2)  | 44 (1)  |
| C (5I)  | 14843 (3) | 5226 (3)  | 3682 (2)  | 46 (1)  |
| C (6I)  | 15009 (3) | 4641 (3)  | 3204 (2)  | 44 (1)  |

|        |           |          |          |        |
|--------|-----------|----------|----------|--------|
| C (7I) | 14374 (3) | 4166 (3) | 2769 (2) | 40 (1) |
| Cu (1) | 7714 (1)  | 2848 (1) | 371 (1)  | 27 (1) |
| Cu (2) | 7010 (1)  | 2336 (1) | 1488 (1) | 25 (1) |
| Cu (3) | 7971 (1)  | 1101 (1) | 767 (1)  | 27 (1) |
| Cu (4) | 12147 (1) | 2187 (1) | 1872 (1) | 27 (1) |
| Cu (5) | 10827 (1) | 5292 (1) | 2581 (1) | 24 (1) |
| Cu (6) | 10377 (1) | 2829 (1) | 3998 (1) | 23 (1) |
| N (1)  | 8206 (2)  | 3906 (2) | 281 (2)  | 40 (1) |
| N (2)  | 6915 (2)  | 2635 (2) | 2429 (2) | 31 (1) |
| N (3)  | 8821 (2)  | 283 (2)  | 759 (2)  | 28 (1) |
| N (4)  | 11315 (2) | 6296 (2) | 2398 (2) | 32 (1) |
| N (5)  | 10210 (2) | 3087 (2) | 4899 (2) | 28 (1) |
| N (6)  | 12978 (2) | 1359 (3) | 1796 (2) | 41 (1) |
| O (1)  | 7222 (2)  | 1926 (2) | 614 (1)  | 25 (1) |
| O (2)  | 8171 (2)  | 3247 (2) | 1284 (1) | 28 (1) |
| O (3)  | 8063 (2)  | 1933 (2) | 1793 (1) | 24 (1) |
| O (4)  | 8885 (2)  | 1876 (2) | 815 (1)  | 26 (1) |
| O (5)  | 10814 (2) | 4797 (2) | 1687 (1) | 28 (1) |
| O (6)  | 9488 (2)  | 3534 (2) | 3836 (1) | 21 (1) |
| O (7)  | 11413 (2) | 1355 (2) | 2027 (1) | 25 (1) |
| O (8)  | 6425 (2)  | 3348 (2) | 446 (2)  | 35 (1) |
| O (9)  | 6049 (2)  | 2891 (2) | 1251 (1) | 31 (1) |
| O (10) | 6291 (2)  | 1056 (2) | 1274 (2) | 34 (1) |
| O (11) | 7094 (2)  | 298 (2)  | 695 (2)  | 39 (1) |
| O (12) | 7381 (2)  | 2388 (2) | -533 (2) | 42 (1) |
| O (13) | 8606 (3)  | 2210 (4) | -727 (3) | 50 (2) |
| O (14) | 9573 (2)  | 5653 (2) | 2606 (1) | 28 (1) |
| O (15) | 9267 (2)  | 4863 (2) | 3242 (1) | 24 (1) |
| O (16) | 9796 (2)  | 1602 (2) | 3762 (1) | 31 (1) |
| O (17) | 10475 (2) | 1182 (2) | 2965 (1) | 27 (1) |
| O (18) | 11829 (2) | 2218 (2) | 859 (1)  | 36 (1) |
| O (19) | 11337 (2) | 3422 (2) | 980 (1)  | 29 (1) |
| O (20) | 11248 (2) | 5635 (2) | 3504 (1) | 27 (1) |
| O (21) | 10843 (2) | 4579 (2) | 3874 (1) | 25 (1) |
| O (22) | 11521 (2) | 2544 (2) | 4226 (1) | 31 (1) |
| O (23) | 11918 (2) | 2228 (2) | 3263 (1) | 27 (1) |
| O (30) | 12985 (2) | 3109 (2) | 2116 (2) | 35 (1) |
| O (31) | 12196 (2) | 4152 (2) | 2219 (1) | 26 (1) |
| O (32) | 7966 (6)  | 1268 (6) | -501 (4) | 57 (3) |
| O (24) | 10492 (2) | 2943 (2) | 3169 (1) | 21 (1) |
| O (25) | 11276 (2) | 2807 (2) | 2143 (1) | 22 (1) |
| O (26) | 10590 (2) | 4192 (2) | 2591 (1) | 22 (1) |
| O (27) | 9108 (2)  | 3359 (2) | 2470 (1) | 21 (1) |
| O (28) | 9788 (2)  | 1972 (2) | 2056 (1) | 23 (1) |
| O (29) | 9912 (2)  | 3218 (2) | 1454 (1) | 23 (1) |
| Ti (1) | 9086 (1)  | 2638 (1) | 1690 (1) | 22 (1) |
| Ti (2) | 10926 (1) | 3674 (1) | 1824 (1) | 22 (1) |
| Ti (3) | 9900 (1)  | 3865 (1) | 3103 (1) | 20 (1) |
| Ti (4) | 10773 (1) | 2108 (1) | 2573 (1) | 21 (1) |

---

All esds (except the esd in the dihedral angle between two l.s. planes) are estimated using the full covariance matrix. The cell esds are taken

into account individually in the estimation of esds in distances, angles and torsion angles; correlations between esds in cell parameters are only used when they are defined by crystal symmetry. An approximate (isotropic) treatment of cell esds is used for estimating esds involving l.s. planes.

Table 3. Bond lengths [Å] and angles [deg] for 06mz171m.

|               |           |               |           |
|---------------|-----------|---------------|-----------|
| C(1A)-O(8)    | 1.248(5)  | C(11Z)-H(11V) | 0.9800    |
| C(1A)-O(9)    | 1.264(5)  | C(1B)-O(10)   | 1.235(5)  |
| C(1A)-C(2A)   | 1.501(6)  | C(1B)-O(11)   | 1.290(5)  |
| C(2A)-C(7A)   | 1.384(6)  | C(1B)-C(2B)   | 1.507(6)  |
| C(2A)-C(3A)   | 1.393(6)  | C(2B)-C(3B)   | 1.360(7)  |
| C(3A)-C(4A)   | 1.385(6)  | C(2B)-C(7B)   | 1.362(7)  |
| C(3A)-H(3A)   | 0.9500    | C(3B)-C(4B)   | 1.382(7)  |
| C(4A)-C(5A)   | 1.365(7)  | C(3B)-H(3B)   | 0.9500    |
| C(4A)-H(4A)   | 0.9500    | C(4B)-C(5B)   | 1.375(8)  |
| C(5A)-C(6A)   | 1.386(8)  | C(4B)-H(4B)   | 0.9500    |
| C(5A)-H(5A)   | 0.9500    | C(5B)-C(6B)   | 1.357(8)  |
| C(6A)-C(7A)   | 1.382(6)  | C(5B)-H(5B)   | 0.9500    |
| C(6A)-H(6A)   | 0.9500    | C(6B)-C(7B)   | 1.398(7)  |
| C(7A)-H(7A)   | 0.9500    | C(6B)-H(6B)   | 0.9500    |
| C(8A)-O(2)    | 1.450(9)  | C(7B)-H(7B)   | 0.9500    |
| C(8A)-C(9A)   | 1.516(11) | C(8B)-O(3)    | 1.428(5)  |
| C(8A)-H(8A1)  | 0.9900    | C(8B)-C(9B)   | 1.491(6)  |
| C(8A)-H(8A2)  | 0.9900    | C(8B)-H(8B1)  | 0.9900    |
| C(9A)-N(1)    | 1.498(7)  | C(8B)-H(8B2)  | 0.9900    |
| C(9A)-H(9A1)  | 0.9900    | C(9B)-N(2)    | 1.495(6)  |
| C(9A)-H(9A2)  | 0.9900    | C(9B)-H(9B1)  | 0.9900    |
| C(10A)-N(1)   | 1.410(8)  | C(9B)-H(9B2)  | 0.9900    |
| C(10A)-H(10A) | 0.9800    | C(10B)-N(2)   | 1.486(6)  |
| C(10A)-H(10B) | 0.9800    | C(10B)-H(10D) | 0.9800    |
| C(10A)-H(10C) | 0.9800    | C(10B)-H(10E) | 0.9800    |
| C(11A)-N(1)   | 1.539(8)  | C(10B)-H(10F) | 0.9800    |
| C(11A)-H(11A) | 0.9800    | C(11B)-N(2)   | 1.474(6)  |
| C(11A)-H(11B) | 0.9800    | C(11B)-H(11D) | 0.9800    |
| C(11A)-H(11C) | 0.9800    | C(11B)-H(11E) | 0.9800    |
| C(8Z)-O(2)    | 1.455(13) | C(11B)-H(11F) | 0.9800    |
| C(8Z)-C(9Z)   | 1.520(14) | C(1)-O(12)    | 1.251(16) |
| C(8Z)-H(8Z1)  | 0.9900    | C(1)-O(32)    | 1.295(17) |
| C(8Z)-H(8Z2)  | 0.9900    | C(1)-C(2)     | 1.445(19) |
| C(9Z)-N(1)    | 1.608(10) | C(2)-C(3)     | 1.3900    |
| C(9Z)-H(9Z1)  | 0.9900    | C(2)-C(7)     | 1.3900    |
| C(9Z)-H(9Z2)  | 0.9900    | C(3)-C(4)     | 1.3900    |
| C(10Z)-N(1)   | 1.539(11) | C(3)-H(3)     | 0.9500    |
| C(10Z)-H(10T) | 0.9800    | C(4)-C(5)     | 1.3900    |
| C(10Z)-H(10U) | 0.9800    | C(4)-H(4C)    | 0.9500    |
| C(10Z)-H(10V) | 0.9800    | C(5)-C(6)     | 1.3900    |
| C(11Z)-N(1)   | 1.374(10) | C(5)-H(5)     | 0.9500    |
| C(11Z)-H(11T) | 0.9800    | C(6)-C(7)     | 1.3900    |
| C(11Z)-H(11U) | 0.9800    | C(6)-H(6)     | 0.9500    |

|               |           |               |           |
|---------------|-----------|---------------|-----------|
| C(7)-H(7)     | 0.9500    | C(10D)-H(10L) | 0.9800    |
| C(1C)-O(12)   | 1.219(10) | C(11D)-N(4)   | 1.468(6)  |
| C(1C)-O(13)   | 1.221(11) | C(11D)-H(11J) | 0.9800    |
| C(1C)-C(2C)   | 1.535(12) | C(11D)-H(11K) | 0.9800    |
| C(2C)-C(3C)   | 1.3900    | C(11D)-H(11L) | 0.9800    |
| C(2C)-C(7C)   | 1.3900    | C(1E)-O(16)   | 1.245(5)  |
| C(3C)-C(4C)   | 1.3900    | C(1E)-O(17)   | 1.281(5)  |
| C(3C)-H(3C)   | 0.9500    | C(1E)-C(2E)   | 1.493(7)  |
| C(4C)-C(5C)   | 1.3900    | C(2E)-C(7E)   | 1.375(7)  |
| C(4C)-H(4C1)  | 0.9500    | C(2E)-C(3E)   | 1.399(7)  |
| C(5C)-C(6C)   | 1.3900    | C(3E)-C(4E)   | 1.373(9)  |
| C(5C)-H(5C)   | 0.9500    | C(3E)-H(3E)   | 0.9500    |
| C(6C)-C(7C)   | 1.3900    | C(4E)-C(5E)   | 1.395(10) |
| C(6C)-H(6C)   | 0.9500    | C(4E)-H(4E)   | 0.9500    |
| C(7C)-H(7C)   | 0.9500    | C(5E)-C(6E)   | 1.389(9)  |
| C(8C)-O(4)    | 1.415(5)  | C(5E)-H(5E)   | 0.9500    |
| C(8C)-C(9C)   | 1.513(7)  | C(6E)-C(7E)   | 1.392(7)  |
| C(8C)-H(8C1)  | 0.9900    | C(6E)-H(6E)   | 0.9500    |
| C(8C)-H(8C2)  | 0.9900    | C(7E)-H(7E)   | 0.9500    |
| C(9C)-N(3)    | 1.487(6)  | C(8E)-O(6)    | 1.419(5)  |
| C(9C)-H(9C1)  | 0.9900    | C(8E)-C(9E)   | 1.526(6)  |
| C(9C)-H(9C2)  | 0.9900    | C(8E)-H(8E1)  | 0.9900    |
| C(10C)-N(3)   | 1.488(6)  | C(8E)-H(8E2)  | 0.9900    |
| C(10C)-H(10G) | 0.9800    | C(9E)-N(5)    | 1.473(5)  |
| C(10C)-H(10H) | 0.9800    | C(9E)-H(9E1)  | 0.9900    |
| C(10C)-H(10I) | 0.9800    | C(9E)-H(9E2)  | 0.9900    |
| C(11C)-N(3)   | 1.496(5)  | C(10E)-N(5)   | 1.501(6)  |
| C(11C)-H(11G) | 0.9800    | C(10E)-H(10M) | 0.9800    |
| C(11C)-H(11H) | 0.9800    | C(10E)-H(10N) | 0.9800    |
| C(11C)-H(11I) | 0.9800    | C(10E)-H(10O) | 0.9800    |
| C(1D)-O(14)   | 1.245(5)  | C(11E)-N(5)   | 1.461(6)  |
| C(1D)-O(15)   | 1.268(5)  | C(11E)-H(11M) | 0.9800    |
| C(1D)-C(2D)   | 1.494(6)  | C(11E)-H(11N) | 0.9800    |
| C(2D)-C(7D)   | 1.364(6)  | C(11E)-H(11O) | 0.9800    |
| C(2D)-C(3D)   | 1.400(7)  | C(1F)-O(18)   | 1.227(6)  |
| C(3D)-C(4D)   | 1.370(8)  | C(1F)-O(19)   | 1.278(5)  |
| C(3D)-H(3D)   | 0.9500    | C(1F)-C(2F)   | 1.506(6)  |
| C(4D)-C(5D)   | 1.398(10) | C(2F)-C(7F)   | 1.383(7)  |
| C(4D)-H(4D)   | 0.9500    | C(2F)-C(3F)   | 1.412(7)  |
| C(5D)-C(6D)   | 1.378(9)  | C(3F)-C(4F)   | 1.360(8)  |
| C(5D)-H(5D)   | 0.9500    | C(3F)-H(3F)   | 0.9500    |
| C(6D)-C(7D)   | 1.366(7)  | C(4F)-C(5F)   | 1.377(10) |
| C(6D)-H(6D)   | 0.9500    | C(4F)-H(4F)   | 0.9500    |
| C(7D)-H(7D)   | 0.9500    | C(5F)-C(6F)   | 1.392(10) |
| C(8D)-O(5)    | 1.403(5)  | C(5F)-H(5F)   | 0.9500    |
| C(8D)-C(9D)   | 1.528(7)  | C(6F)-C(7F)   | 1.399(7)  |
| C(8D)-H(8D1)  | 0.9900    | C(6F)-H(6F)   | 0.9500    |
| C(8D)-H(8D2)  | 0.9900    | C(7F)-H(7F)   | 0.9500    |
| C(9D)-N(4)    | 1.501(6)  | C(8F)-O(7)    | 1.421(5)  |
| C(9D)-H(9D1)  | 0.9900    | C(8F)-C(9F)   | 1.533(6)  |
| C(9D)-H(9D2)  | 0.9900    | C(8F)-H(8F1)  | 0.9900    |
| C(10D)-N(4)   | 1.490(6)  | C(8F)-H(8F2)  | 0.9900    |
| C(10D)-H(10J) | 0.9800    | C(9F)-N(6)    | 1.482(6)  |
| C(10D)-H(10K) | 0.9800    | C(9F)-H(9F1)  | 0.9900    |

|               |          |             |            |
|---------------|----------|-------------|------------|
| C(9F)-H(9F2)  | 0.9900   | Cu(1)-N(1)  | 2.028(4)   |
| C(10F)-N(6)   | 1.480(7) | Cu(1)-O(8)  | 2.338(3)   |
| C(10F)-H(10P) | 0.9800   | Cu(2)-O(9)  | 1.934(3)   |
| C(10F)-H(10Q) | 0.9800   | Cu(2)-O(3)  | 1.956(3)   |
| C(10F)-H(10R) | 0.9800   | Cu(2)-O(1)  | 1.988(3)   |
| C(11F)-N(6)   | 1.499(7) | Cu(2)-N(2)  | 2.050(4)   |
| C(11F)-H(11P) | 0.9800   | Cu(2)-O(10) | 2.380(3)   |
| C(11F)-H(11Q) | 0.9800   | Cu(2)-Cu(3) | 3.0358(10) |
| C(11F)-H(11R) | 0.9800   | Cu(3)-O(11) | 1.920(3)   |
| C(1G)-O(20)   | 1.264(5) | Cu(3)-O(4)  | 1.945(3)   |
| C(1G)-O(21)   | 1.265(5) | Cu(3)-O(1)  | 1.966(3)   |
| C(1G)-C(2G)   | 1.512(5) | Cu(3)-N(3)  | 2.026(4)   |
| C(2G)-C(7G)   | 1.371(6) | Cu(3)-O(3)  | 2.372(3)   |
| C(2G)-C(3G)   | 1.391(6) | Cu(4)-O(25) | 1.920(3)   |
| C(3G)-C(4G)   | 1.395(6) | Cu(4)-O(7)  | 1.958(3)   |
| C(3G)-H(3G)   | 0.9500   | Cu(4)-O(30) | 1.981(3)   |
| C(4G)-C(5G)   | 1.361(8) | Cu(4)-N(6)  | 2.018(4)   |
| C(4G)-H(4G)   | 0.9500   | Cu(4)-O(18) | 2.205(3)   |
| C(5G)-C(6G)   | 1.379(8) | Cu(4)-Ti(4) | 2.9491(12) |
| C(5G)-H(5G)   | 0.9500   | Cu(5)-O(26) | 1.929(3)   |
| C(6G)-C(7G)   | 1.392(6) | Cu(5)-O(5)  | 1.960(3)   |
| C(6G)-H(6G)   | 0.9500   | Cu(5)-O(20) | 1.975(3)   |
| C(7G)-H(7G)   | 0.9500   | Cu(5)-N(4)  | 2.023(4)   |
| C(1H)-O(22)   | 1.266(5) | Cu(5)-O(14) | 2.181(3)   |
| C(1H)-O(23)   | 1.267(5) | Cu(5)-Ti(2) | 2.9567(12) |
| C(1H)-C(2H)   | 1.518(6) | Cu(6)-O(24) | 1.907(3)   |
| C(2H)-C(7H)   | 1.372(6) | Cu(6)-O(22) | 1.970(3)   |
| C(2H)-C(3H)   | 1.377(6) | Cu(6)-O(6)  | 1.975(3)   |
| C(3H)-C(4H)   | 1.400(6) | Cu(6)-N(5)  | 1.995(3)   |
| C(3H)-H(3H)   | 0.9500   | Cu(6)-O(16) | 2.206(3)   |
| C(4H)-C(5H)   | 1.382(7) | Cu(6)-Ti(3) | 2.9567(11) |
| C(4H)-H(4H)   | 0.9500   | O(1)-H(1)   | 0.813(19)  |
| C(5H)-C(6H)   | 1.384(7) | O(2)-Ti(1)  | 2.057(3)   |
| C(5H)-H(5H)   | 0.9500   | O(3)-Ti(1)  | 2.105(3)   |
| C(6H)-C(7H)   | 1.394(6) | O(4)-Ti(1)  | 2.049(3)   |
| C(6H)-H(6H)   | 0.9500   | O(5)-Ti(2)  | 2.035(3)   |
| C(7H)-H(7H)   | 0.9500   | O(6)-Ti(3)  | 2.022(3)   |
| C(1I)-O(31)   | 1.257(5) | O(7)-Ti(4)  | 2.025(3)   |
| C(1I)-O(30)   | 1.268(5) | O(15)-Ti(3) | 2.044(3)   |
| C(1I)-C(2I)   | 1.499(6) | O(17)-Ti(4) | 2.047(3)   |
| C(2I)-C(7I)   | 1.386(6) | O(19)-Ti(2) | 2.040(3)   |
| C(2I)-C(3I)   | 1.391(6) | O(21)-Ti(3) | 2.201(3)   |
| C(3I)-C(4I)   | 1.384(6) | O(23)-Ti(4) | 2.176(3)   |
| C(3I)-H(3I)   | 0.9500   | O(31)-Ti(2) | 2.174(3)   |
| C(4I)-C(5I)   | 1.368(6) | O(24)-Ti(4) | 1.858(3)   |
| C(4I)-H(4I)   | 0.9500   | O(24)-Ti(3) | 1.917(3)   |
| C(5I)-C(6I)   | 1.365(7) | O(25)-Ti(2) | 1.855(3)   |
| C(5I)-H(5I)   | 0.9500   | O(25)-Ti(4) | 1.920(3)   |
| C(6I)-C(7I)   | 1.389(6) | O(26)-Ti(3) | 1.872(3)   |
| C(6I)-H(6I)   | 0.9500   | O(26)-Ti(2) | 1.908(3)   |
| C(7I)-H(7I)   | 0.9500   | O(27)-Ti(3) | 1.779(3)   |
| Cu(1)-O(12)   | 1.943(3) | O(27)-Ti(1) | 1.881(3)   |
| Cu(1)-O(1)    | 1.969(3) | O(28)-Ti(4) | 1.788(3)   |
| Cu(1)-O(2)    | 1.976(3) | O(28)-Ti(1) | 1.865(3)   |

|                       |            |                        |          |
|-----------------------|------------|------------------------|----------|
| O(29) -Ti(2)          | 1.793(3)   | C(8Z) -C(9Z) -H(9Z2)   | 109.8    |
| O(29) -Ti(1)          | 1.861(3)   | N(1) -C(9Z) -H(9Z2)    | 109.8    |
| Ti(1) -Ti(4)          | 3.3776(13) | H(9Z1) -C(9Z) -H(9Z2)  | 108.3    |
| Ti(1) -Ti(3)          | 3.3812(13) | N(1) -C(10Z) -H(10T)   | 109.5    |
| Ti(1) -Ti(2)          | 3.3855(14) | N(1) -C(10Z) -H(10U)   | 109.5    |
|                       |            | N(1) -C(10Z) -H(10V)   | 109.5    |
| O(8) -C(1A) -O(9)     | 126.5(4)   | N(1) -C(11Z) -H(11T)   | 109.5    |
| O(8) -C(1A) -C(2A)    | 117.9(4)   | N(1) -C(11Z) -H(11U)   | 109.5    |
| O(9) -C(1A) -C(2A)    | 115.6(4)   | N(1) -C(11Z) -H(11V)   | 109.5    |
| C(7A) -C(2A) -C(3A)   | 119.6(4)   | O(10) -C(1B) -O(11)    | 126.0(4) |
| C(7A) -C(2A) -C(1A)   | 120.5(4)   | O(10) -C(1B) -C(2B)    | 119.9(4) |
| C(3A) -C(2A) -C(1A)   | 119.8(4)   | O(11) -C(1B) -C(2B)    | 114.1(4) |
| C(4A) -C(3A) -C(2A)   | 120.0(5)   | C(3B) -C(2B) -C(7B)    | 117.1(5) |
| C(4A) -C(3A) -H(3A)   | 120.0      | C(3B) -C(2B) -C(1B)    | 120.4(4) |
| C(2A) -C(3A) -H(3A)   | 120.0      | C(7B) -C(2B) -C(1B)    | 122.5(4) |
| C(5A) -C(4A) -C(3A)   | 119.7(5)   | C(2B) -C(3B) -C(4B)    | 121.8(5) |
| C(5A) -C(4A) -H(4A)   | 120.1      | C(2B) -C(3B) -H(3B)    | 119.1    |
| C(3A) -C(4A) -H(4A)   | 120.1      | C(4B) -C(3B) -H(3B)    | 119.1    |
| C(4A) -C(5A) -C(6A)   | 121.0(5)   | C(5B) -C(4B) -C(3B)    | 120.7(5) |
| C(4A) -C(5A) -H(5A)   | 119.5      | C(5B) -C(4B) -H(4B)    | 119.7    |
| C(6A) -C(5A) -H(5A)   | 119.5      | C(3B) -C(4B) -H(4B)    | 119.7    |
| C(7A) -C(6A) -C(5A)   | 119.5(5)   | C(6B) -C(5B) -C(4B)    | 118.2(5) |
| C(7A) -C(6A) -H(6A)   | 120.3      | C(6B) -C(5B) -H(5B)    | 120.9    |
| C(5A) -C(6A) -H(6A)   | 120.3      | C(4B) -C(5B) -H(5B)    | 120.9    |
| C(6A) -C(7A) -C(2A)   | 120.1(5)   | C(5B) -C(6B) -C(7B)    | 120.2(6) |
| C(6A) -C(7A) -H(7A)   | 119.9      | C(5B) -C(6B) -H(6B)    | 119.9    |
| C(2A) -C(7A) -H(7A)   | 119.9      | C(7B) -C(6B) -H(6B)    | 119.9    |
| O(2) -C(8A) -C(9A)    | 111.4(8)   | C(2B) -C(7B) -C(6B)    | 122.0(5) |
| O(2) -C(8A) -H(8A1)   | 109.3      | C(2B) -C(7B) -H(7B)    | 119.0    |
| C(9A) -C(8A) -H(8A1)  | 109.3      | C(6B) -C(7B) -H(7B)    | 119.0    |
| O(2) -C(8A) -H(8A2)   | 109.3      | O(3) -C(8B) -C(9B)     | 109.3(4) |
| C(9A) -C(8A) -H(8A2)  | 109.3      | O(3) -C(8B) -H(8B1)    | 109.8    |
| H(8A1) -C(8A) -H(8A2) | 108.0      | C(9B) -C(8B) -H(8B1)   | 109.8    |
| N(1) -C(9A) -C(8A)    | 106.1(6)   | O(3) -C(8B) -H(8B2)    | 109.8    |
| N(1) -C(9A) -H(9A1)   | 110.5      | C(9B) -C(8B) -H(8B2)   | 109.8    |
| C(8A) -C(9A) -H(9A1)  | 110.5      | H(8B1) -C(8B) -H(8B2)  | 108.3    |
| N(1) -C(9A) -H(9A2)   | 110.5      | C(8B) -C(9B) -N(2)     | 110.0(4) |
| C(8A) -C(9A) -H(9A2)  | 110.5      | C(8B) -C(9B) -H(9B1)   | 109.7    |
| H(9A1) -C(9A) -H(9A2) | 108.7      | N(2) -C(9B) -H(9B1)    | 109.7    |
| N(1) -C(10A) -H(10A)  | 109.5      | C(8B) -C(9B) -H(9B2)   | 109.7    |
| N(1) -C(10A) -H(10B)  | 109.5      | N(2) -C(9B) -H(9B2)    | 109.7    |
| N(1) -C(10A) -H(10C)  | 109.5      | H(9B1) -C(9B) -H(9B2)  | 108.2    |
| N(1) -C(11A) -H(11A)  | 109.5      | N(2) -C(10B) -H(10D)   | 109.5    |
| N(1) -C(11A) -H(11B)  | 109.5      | N(2) -C(10B) -H(10E)   | 109.5    |
| N(1) -C(11A) -H(11C)  | 109.5      | H(10D) -C(10B) -H(10E) | 109.5    |
| O(2) -C(8Z) -C(9Z)    | 99.8(10)   | N(2) -C(10B) -H(10F)   | 109.5    |
| O(2) -C(8Z) -H(8Z1)   | 111.8      | H(10D) -C(10B) -H(10F) | 109.5    |
| C(9Z) -C(8Z) -H(8Z1)  | 111.8      | H(10E) -C(10B) -H(10F) | 109.5    |
| O(2) -C(8Z) -H(8Z2)   | 111.8      | N(2) -C(11B) -H(11D)   | 109.5    |
| C(9Z) -C(8Z) -H(8Z2)  | 111.8      | N(2) -C(11B) -H(11E)   | 109.5    |
| H(8Z1) -C(8Z) -H(8Z2) | 109.5      | H(11D) -C(11B) -H(11E) | 109.5    |
| C(8Z) -C(9Z) -N(1)    | 109.3(11)  | N(2) -C(11B) -H(11F)   | 109.5    |
| C(8Z) -C(9Z) -H(9Z1)  | 109.8      | H(11D) -C(11B) -H(11F) | 109.5    |
| N(1) -C(9Z) -H(9Z1)   | 109.8      | H(11E) -C(11B) -H(11F) | 109.5    |

|                         |            |                          |           |
|-------------------------|------------|--------------------------|-----------|
| O(12) - C(1) - O(32)    | 119.9 (11) | N(3) - C(10C) - H(10G)   | 109.5     |
| O(12) - C(1) - C(2)     | 117.0 (13) | N(3) - C(10C) - H(10H)   | 109.5     |
| O(32) - C(1) - C(2)     | 121.6 (13) | H(10G) - C(10C) - H(10H) | 109.5     |
| C(3) - C(2) - C(7)      | 120.0      | N(3) - C(10C) - H(10I)   | 109.5     |
| C(3) - C(2) - C(1)      | 119.6 (15) | H(10G) - C(10C) - H(10I) | 109.5     |
| C(7) - C(2) - C(1)      | 120.4 (15) | H(10H) - C(10C) - H(10I) | 109.5     |
| C(2) - C(3) - C(4)      | 120.0      | N(3) - C(11C) - H(11G)   | 109.5     |
| C(2) - C(3) - H(3)      | 120.0      | N(3) - C(11C) - H(11H)   | 109.5     |
| C(4) - C(3) - H(3)      | 120.0      | H(11G) - C(11C) - H(11H) | 109.5     |
| C(3) - C(4) - C(5)      | 120.0      | N(3) - C(11C) - H(11I)   | 109.5     |
| C(3) - C(4) - H(4C)     | 120.0      | H(11G) - C(11C) - H(11I) | 109.5     |
| C(5) - C(4) - H(4C)     | 120.0      | H(11H) - C(11C) - H(11I) | 109.5     |
| C(6) - C(5) - C(4)      | 120.0      | O(14) - C(1D) - O(15)    | 126.6 (4) |
| C(6) - C(5) - H(5)      | 120.0      | O(14) - C(1D) - C(2D)    | 118.5 (4) |
| C(4) - C(5) - H(5)      | 120.0      | O(15) - C(1D) - C(2D)    | 115.0 (4) |
| C(5) - C(6) - C(7)      | 120.0      | C(7D) - C(2D) - C(3D)    | 117.6 (5) |
| C(5) - C(6) - H(6)      | 120.0      | C(7D) - C(2D) - C(1D)    | 123.3 (4) |
| C(7) - C(6) - H(6)      | 120.0      | C(3D) - C(2D) - C(1D)    | 118.8 (5) |
| C(6) - C(7) - C(2)      | 120.0      | C(4D) - C(3D) - C(2D)    | 121.3 (6) |
| C(6) - C(7) - H(7)      | 120.0      | C(4D) - C(3D) - H(3D)    | 119.3     |
| C(2) - C(7) - H(7)      | 120.0      | C(2D) - C(3D) - H(3D)    | 119.3     |
| O(12) - C(1C) - O(13)   | 123.2 (7)  | C(3D) - C(4D) - C(5D)    | 119.7 (7) |
| O(12) - C(1C) - C(2C)   | 120.7 (9)  | C(3D) - C(4D) - H(4D)    | 120.2     |
| O(13) - C(1C) - C(2C)   | 116.1 (9)  | C(5D) - C(4D) - H(4D)    | 120.2     |
| C(3C) - C(2C) - C(7C)   | 120.0      | C(6D) - C(5D) - C(4D)    | 118.6 (6) |
| C(3C) - C(2C) - C(1C)   | 119.4 (9)  | C(6D) - C(5D) - H(5D)    | 120.7     |
| C(7C) - C(2C) - C(1C)   | 120.6 (9)  | C(4D) - C(5D) - H(5D)    | 120.7     |
| C(4C) - C(3C) - C(2C)   | 120.0      | C(7D) - C(6D) - C(5D)    | 120.5 (6) |
| C(4C) - C(3C) - H(3C)   | 120.0      | C(7D) - C(6D) - H(6D)    | 119.7     |
| C(2C) - C(3C) - H(3C)   | 120.0      | C(5D) - C(6D) - H(6D)    | 119.7     |
| C(3C) - C(4C) - C(5C)   | 120.0      | C(2D) - C(7D) - C(6D)    | 121.9 (5) |
| C(3C) - C(4C) - H(4C1)  | 120.0      | C(2D) - C(7D) - H(7D)    | 119.1     |
| C(5C) - C(4C) - H(4C1)  | 120.0      | C(6D) - C(7D) - H(7D)    | 119.1     |
| C(6C) - C(5C) - C(4C)   | 120.0      | O(5) - C(8D) - C(9D)     | 108.6 (4) |
| C(6C) - C(5C) - H(5C)   | 120.0      | O(5) - C(8D) - H(8D1)    | 110.0     |
| C(4C) - C(5C) - H(5C)   | 120.0      | C(9D) - C(8D) - H(8D1)   | 110.0     |
| C(7C) - C(6C) - C(5C)   | 120.0      | O(5) - C(8D) - H(8D2)    | 110.0     |
| C(7C) - C(6C) - H(6C)   | 120.0      | C(9D) - C(8D) - H(8D2)   | 110.0     |
| C(5C) - C(6C) - H(6C)   | 120.0      | H(8D1) - C(8D) - H(8D2)  | 108.4     |
| C(6C) - C(7C) - C(2C)   | 120.0      | N(4) - C(9D) - C(8D)     | 108.9 (4) |
| C(6C) - C(7C) - H(7C)   | 120.0      | N(4) - C(9D) - H(9D1)    | 109.9     |
| C(2C) - C(7C) - H(7C)   | 120.0      | C(8D) - C(9D) - H(9D1)   | 109.9     |
| O(4) - C(8C) - C(9C)    | 109.3 (4)  | N(4) - C(9D) - H(9D2)    | 109.9     |
| O(4) - C(8C) - H(8C1)   | 109.8      | C(8D) - C(9D) - H(9D2)   | 109.9     |
| C(9C) - C(8C) - H(8C1)  | 109.8      | H(9D1) - C(9D) - H(9D2)  | 108.3     |
| O(4) - C(8C) - H(8C2)   | 109.8      | N(4) - C(10D) - H(10J)   | 109.5     |
| C(9C) - C(8C) - H(8C2)  | 109.8      | N(4) - C(10D) - H(10K)   | 109.5     |
| H(8C1) - C(8C) - H(8C2) | 108.3      | H(10J) - C(10D) - H(10K) | 109.5     |
| N(3) - C(9C) - C(8C)    | 109.8 (4)  | N(4) - C(10D) - H(10L)   | 109.5     |
| N(3) - C(9C) - H(9C1)   | 109.7      | H(10J) - C(10D) - H(10L) | 109.5     |
| C(8C) - C(9C) - H(9C1)  | 109.7      | H(10K) - C(10D) - H(10L) | 109.5     |
| N(3) - C(9C) - H(9C2)   | 109.7      | N(4) - C(11D) - H(11J)   | 109.5     |
| C(8C) - C(9C) - H(9C2)  | 109.7      | N(4) - C(11D) - H(11K)   | 109.5     |
| H(9C1) - C(9C) - H(9C2) | 108.2      | H(11J) - C(11D) - H(11K) | 109.5     |



|                        |          |                        |          |
|------------------------|----------|------------------------|----------|
| N(4) -C(11D) -H(11L)   | 109.5    | C(4F) -C(3F) -C(2F)    | 121.5(6) |
| H(11J) -C(11D) -H(11L) | 109.5    | C(4F) -C(3F) -H(3F)    | 119.2    |
| H(11K) -C(11D) -H(11L) | 109.5    | C(2F) -C(3F) -H(3F)    | 119.2    |
| O(16) -C(1E) -O(17)    | 124.5(4) | C(3F) -C(4F) -C(5F)    | 118.5(7) |
| O(16) -C(1E) -C(2E)    | 119.4(4) | C(3F) -C(4F) -H(4F)    | 120.8    |
| O(17) -C(1E) -C(2E)    | 116.1(4) | C(5F) -C(4F) -H(4F)    | 120.8    |
| C(7E) -C(2E) -C(3E)    | 119.4(5) | C(4F) -C(5F) -C(6F)    | 122.5(6) |
| C(7E) -C(2E) -C(1E)    | 121.0(4) | C(4F) -C(5F) -H(5F)    | 118.7    |
| C(3E) -C(2E) -C(1E)    | 119.6(5) | C(6F) -C(5F) -H(5F)    | 118.7    |
| C(4E) -C(3E) -C(2E)    | 120.2(6) | C(5F) -C(6F) -C(7F)    | 118.1(6) |
| C(4E) -C(3E) -H(3E)    | 119.9    | C(5F) -C(6F) -H(6F)    | 121.0    |
| C(2E) -C(3E) -H(3E)    | 119.9    | C(7F) -C(6F) -H(6F)    | 121.0    |
| C(3E) -C(4E) -C(5E)    | 120.8(7) | C(2F) -C(7F) -C(6F)    | 120.4(6) |
| C(3E) -C(4E) -H(4E)    | 119.6    | C(2F) -C(7F) -H(7F)    | 119.8    |
| C(5E) -C(4E) -H(4E)    | 119.6    | C(6F) -C(7F) -H(7F)    | 119.8    |
| C(6E) -C(5E) -C(4E)    | 118.7(6) | O(7) -C(8F) -C(9F)     | 105.8(4) |
| C(6E) -C(5E) -H(5E)    | 120.6    | O(7) -C(8F) -H(8F1)    | 110.6    |
| C(4E) -C(5E) -H(5E)    | 120.6    | C(9F) -C(8F) -H(8F1)   | 110.6    |
| C(5E) -C(6E) -C(7E)    | 120.4(6) | O(7) -C(8F) -H(8F2)    | 110.6    |
| C(5E) -C(6E) -H(6E)    | 119.8    | C(9F) -C(8F) -H(8F2)   | 110.6    |
| C(7E) -C(6E) -H(6E)    | 119.8    | H(8F1) -C(8F) -H(8F2)  | 108.7    |
| C(2E) -C(7E) -C(6E)    | 120.4(5) | N(6) -C(9F) -C(8F)     | 109.8(4) |
| C(2E) -C(7E) -H(7E)    | 119.8    | N(6) -C(9F) -H(9F1)    | 109.7    |
| C(6E) -C(7E) -H(7E)    | 119.8    | C(8F) -C(9F) -H(9F1)   | 109.7    |
| O(6) -C(8E) -C(9E)     | 106.8(3) | N(6) -C(9F) -H(9F2)    | 109.7    |
| O(6) -C(8E) -H(8E1)    | 110.4    | C(8F) -C(9F) -H(9F2)   | 109.7    |
| C(9E) -C(8E) -H(8E1)   | 110.4    | H(9F1) -C(9F) -H(9F2)  | 108.2    |
| O(6) -C(8E) -H(8E2)    | 110.4    | N(6) -C(10F) -H(10P)   | 109.5    |
| C(9E) -C(8E) -H(8E2)   | 110.4    | N(6) -C(10F) -H(10Q)   | 109.5    |
| H(8E1) -C(8E) -H(8E2)  | 108.6    | H(10P) -C(10F) -H(10Q) | 109.5    |
| N(5) -C(9E) -C(8E)     | 109.6(4) | N(6) -C(10F) -H(10R)   | 109.5    |
| N(5) -C(9E) -H(9E1)    | 109.7    | H(10P) -C(10F) -H(10R) | 109.5    |
| C(8E) -C(9E) -H(9E1)   | 109.7    | H(10Q) -C(10F) -H(10R) | 109.5    |
| N(5) -C(9E) -H(9E2)    | 109.7    | N(6) -C(11F) -H(11P)   | 109.5    |
| C(8E) -C(9E) -H(9E2)   | 109.7    | N(6) -C(11F) -H(11Q)   | 109.5    |
| H(9E1) -C(9E) -H(9E2)  | 108.2    | H(11P) -C(11F) -H(11Q) | 109.5    |
| N(5) -C(10E) -H(10M)   | 109.5    | N(6) -C(11F) -H(11R)   | 109.5    |
| N(5) -C(10E) -H(10N)   | 109.5    | H(11P) -C(11F) -H(11R) | 109.5    |
| H(10M) -C(10E) -H(10N) | 109.5    | H(11Q) -C(11F) -H(11R) | 109.5    |
| N(5) -C(10E) -H(10O)   | 109.5    | O(20) -C(1G) -O(21)    | 127.2(4) |
| H(10M) -C(10E) -H(10O) | 109.5    | O(20) -C(1G) -C(2G)    | 115.7(4) |
| H(10N) -C(10E) -H(10O) | 109.5    | O(21) -C(1G) -C(2G)    | 117.0(4) |
| N(5) -C(11E) -H(11M)   | 109.5    | C(7G) -C(2G) -C(3G)    | 120.2(4) |
| N(5) -C(11E) -H(11N)   | 109.5    | C(7G) -C(2G) -C(1G)    | 119.6(4) |
| H(11M) -C(11E) -H(11N) | 109.5    | C(3G) -C(2G) -C(1G)    | 120.2(4) |
| N(5) -C(11E) -H(11O)   | 109.5    | C(2G) -C(3G) -C(4G)    | 119.3(5) |
| H(11M) -C(11E) -H(11O) | 109.5    | C(2G) -C(3G) -H(3G)    | 120.3    |
| H(11N) -C(11E) -H(11O) | 109.5    | C(4G) -C(3G) -H(3G)    | 120.3    |
| O(18) -C(1F) -O(19)    | 126.8(4) | C(5G) -C(4G) -C(3G)    | 120.3(5) |
| O(18) -C(1F) -C(2F)    | 118.7(4) | C(5G) -C(4G) -H(4G)    | 119.8    |
| O(19) -C(1F) -C(2F)    | 114.5(4) | C(3G) -C(4G) -H(4G)    | 119.8    |
| C(7F) -C(2F) -C(3F)    | 118.9(5) | C(4G) -C(5G) -C(6G)    | 120.2(5) |
| C(7F) -C(2F) -C(1F)    | 122.1(5) | C(4G) -C(5G) -H(5G)    | 119.9    |
| C(3F) -C(2F) -C(1F)    | 118.9(5) | C(6G) -C(5G) -H(5G)    | 119.9    |

|                        |             |                        |             |
|------------------------|-------------|------------------------|-------------|
| C (5G) -C (6G) -C (7G) | 120.2 (5)   | O (12) -Cu (1) -O (8)  | 92.53 (13)  |
| C (5G) -C (6G) -H (6G) | 119.9       | O (1) -Cu (1) -O (8)   | 83.93 (12)  |
| C (7G) -C (6G) -H (6G) | 119.9       | O (2) -Cu (1) -O (8)   | 94.12 (12)  |
| C (2G) -C (7G) -C (6G) | 119.7 (5)   | N (1) -Cu (1) -O (8)   | 91.89 (14)  |
| C (2G) -C (7G) -H (7G) | 120.2       | O (9) -Cu (2) -O (3)   | 171.41 (13) |
| C (6G) -C (7G) -H (7G) | 120.2       | O (9) -Cu (2) -O (1)   | 96.95 (12)  |
| O (22) -C (1H) -O (23) | 127.6 (4)   | O (3) -Cu (2) -O (1)   | 86.86 (11)  |
| O (22) -C (1H) -C (2H) | 115.4 (4)   | O (9) -Cu (2) -N (2)   | 91.65 (13)  |
| O (23) -C (1H) -C (2H) | 117.0 (4)   | O (3) -Cu (2) -N (2)   | 84.93 (13)  |
| C (7H) -C (2H) -C (3H) | 120.1 (4)   | O (1) -Cu (2) -N (2)   | 171.11 (14) |
| C (7H) -C (2H) -C (1H) | 119.7 (4)   | O (9) -Cu (2) -O (10)  | 96.03 (12)  |
| C (3H) -C (2H) -C (1H) | 120.1 (4)   | O (3) -Cu (2) -O (10)  | 92.16 (11)  |
| C (2H) -C (3H) -C (4H) | 119.8 (5)   | O (1) -Cu (2) -O (10)  | 81.14 (12)  |
| C (2H) -C (3H) -H (3H) | 120.1       | N (2) -Cu (2) -O (10)  | 95.75 (14)  |
| C (4H) -C (3H) -H (3H) | 120.1       | O (9) -Cu (2) -Cu (3)  | 134.52 (9)  |
| C (5H) -C (4H) -C (3H) | 119.4 (5)   | O (3) -Cu (2) -Cu (3)  | 51.35 (8)   |
| C (5H) -C (4H) -H (4H) | 120.3       | O (1) -Cu (2) -Cu (3)  | 39.57 (8)   |
| C (3H) -C (4H) -H (4H) | 120.3       | N (2) -Cu (2) -Cu (3)  | 131.55 (11) |
| C (4H) -C (5H) -C (6H) | 121.0 (5)   | O (10) -Cu (2) -Cu (3) | 69.84 (8)   |
| C (4H) -C (5H) -H (5H) | 119.5       | O (11) -Cu (3) -O (4)  | 177.19 (13) |
| C (6H) -C (5H) -H (5H) | 119.5       | O (11) -Cu (3) -O (1)  | 94.56 (13)  |
| C (5H) -C (6H) -C (7H) | 118.5 (5)   | O (4) -Cu (3) -O (1)   | 87.42 (12)  |
| C (5H) -C (6H) -H (6H) | 120.7       | O (11) -Cu (3) -N (3)  | 91.09 (14)  |
| C (7H) -C (6H) -H (6H) | 120.7       | O (4) -Cu (3) -N (3)   | 86.61 (14)  |
| C (2H) -C (7H) -C (6H) | 121.1 (5)   | O (1) -Cu (3) -N (3)   | 168.12 (13) |
| C (2H) -C (7H) -H (7H) | 119.4       | O (11) -Cu (3) -O (3)  | 105.46 (12) |
| C (6H) -C (7H) -H (7H) | 119.4       | O (4) -Cu (3) -O (3)   | 76.92 (10)  |
| O (31) -C (1I) -O (30) | 126.7 (4)   | O (1) -Cu (3) -O (3)   | 76.75 (11)  |
| O (31) -C (1I) -C (2I) | 117.1 (4)   | N (3) -Cu (3) -O (3)   | 111.77 (12) |
| O (30) -C (1I) -C (2I) | 116.2 (4)   | O (11) -Cu (3) -Cu (2) | 90.24 (10)  |
| C (7I) -C (2I) -C (3I) | 119.2 (4)   | O (4) -Cu (3) -Cu (2)  | 92.56 (9)   |
| C (7I) -C (2I) -C (1I) | 121.0 (4)   | O (1) -Cu (3) -Cu (2)  | 40.09 (8)   |
| C (3I) -C (2I) -C (1I) | 119.7 (4)   | N (3) -Cu (3) -Cu (2)  | 150.52 (10) |
| C (4I) -C (3I) -C (2I) | 120.0 (4)   | O (3) -Cu (3) -Cu (2)  | 40.11 (7)   |
| C (4I) -C (3I) -H (3I) | 120.0       | O (25) -Cu (4) -O (7)  | 79.82 (12)  |
| C (2I) -C (3I) -H (3I) | 120.0       | O (25) -Cu (4) -O (30) | 93.78 (12)  |
| C (5I) -C (4I) -C (3I) | 120.6 (5)   | O (7) -Cu (4) -O (30)  | 155.41 (13) |
| C (5I) -C (4I) -H (4I) | 119.7       | O (25) -Cu (4) -N (6)  | 162.00 (15) |
| C (3I) -C (4I) -H (4I) | 119.7       | O (7) -Cu (4) -N (6)   | 85.63 (15)  |
| C (6I) -C (5I) -C (4I) | 119.6 (4)   | O (30) -Cu (4) -N (6)  | 95.12 (15)  |
| C (6I) -C (5I) -H (5I) | 120.2       | O (25) -Cu (4) -O (18) | 96.41 (12)  |
| C (4I) -C (5I) -H (5I) | 120.2       | O (7) -Cu (4) -O (18)  | 107.93 (12) |
| C (5I) -C (6I) -C (7I) | 121.1 (4)   | O (30) -Cu (4) -O (18) | 96.32 (13)  |
| C (5I) -C (6I) -H (6I) | 119.5       | N (6) -Cu (4) -O (18)  | 98.12 (15)  |
| C (7I) -C (6I) -H (6I) | 119.5       | O (25) -Cu (4) -Ti (4) | 39.82 (8)   |
| C (2I) -C (7I) -C (6I) | 119.4 (4)   | O (7) -Cu (4) -Ti (4)  | 43.12 (8)   |
| C (2I) -C (7I) -H (7I) | 120.3       | O (30) -Cu (4) -Ti (4) | 120.98 (9)  |
| C (6I) -C (7I) -H (7I) | 120.3       | N (6) -Cu (4) -Ti (4)  | 122.77 (13) |
| O (12) -Cu (1) -O (1)  | 93.07 (13)  | O (18) -Cu (4) -Ti (4) | 117.74 (9)  |
| O (12) -Cu (1) -O (2)  | 173.26 (13) | O (26) -Cu (5) -O (5)  | 79.93 (12)  |
| O (1) -Cu (1) -O (2)   | 86.53 (12)  | O (26) -Cu (5) -O (20) | 95.21 (11)  |
| O (12) -Cu (1) -N (1)  | 96.58 (15)  | O (5) -Cu (5) -O (20)  | 158.66 (13) |
| O (1) -Cu (1) -N (1)   | 169.65 (14) | O (26) -Cu (5) -N (4)  | 162.41 (14) |
| O (2) -Cu (1) -N (1)   | 84.33 (14)  | O (5) -Cu (5) -N (4)   | 86.72 (14)  |

|                    |            |                    |            |
|--------------------|------------|--------------------|------------|
| O(20)-Cu(5)-N(4)   | 93.09(14)  | C(9C)-N(3)-Cu(3)   | 106.4(3)   |
| O(26)-Cu(5)-O(14)  | 96.81(12)  | C(10C)-N(3)-Cu(3)  | 110.8(3)   |
| O(5)-Cu(5)-O(14)   | 104.62(12) | C(11C)-N(3)-Cu(3)  | 107.4(3)   |
| O(20)-Cu(5)-O(14)  | 96.56(12)  | C(11D)-N(4)-C(10D) | 108.8(4)   |
| N(4)-Cu(5)-O(14)   | 97.61(14)  | C(11D)-N(4)-C(9D)  | 110.6(4)   |
| O(26)-Cu(5)-Ti(2)  | 39.33(8)   | C(10D)-N(4)-C(9D)  | 110.4(4)   |
| O(5)-Cu(5)-Ti(2)   | 43.25(8)   | C(11D)-N(4)-Cu(5)  | 112.9(3)   |
| O(20)-Cu(5)-Ti(2)  | 124.07(9)  | C(10D)-N(4)-Cu(5)  | 110.1(3)   |
| N(4)-Cu(5)-Ti(2)   | 124.14(11) | C(9D)-N(4)-Cu(5)   | 104.0(3)   |
| O(14)-Cu(5)-Ti(2)  | 115.06(8)  | C(11E)-N(5)-C(9E)  | 111.9(4)   |
| O(24)-Cu(6)-O(22)  | 94.75(12)  | C(11E)-N(5)-C(10E) | 107.8(4)   |
| O(24)-Cu(6)-O(6)   | 79.89(11)  | C(9E)-N(5)-C(10E)  | 109.8(4)   |
| O(22)-Cu(6)-O(6)   | 156.71(13) | C(11E)-N(5)-Cu(6)  | 115.2(3)   |
| O(24)-Cu(6)-N(5)   | 161.23(14) | C(9E)-N(5)-Cu(6)   | 104.4(2)   |
| O(22)-Cu(6)-N(5)   | 93.45(13)  | C(10E)-N(5)-Cu(6)  | 107.6(3)   |
| O(6)-Cu(6)-N(5)    | 85.93(12)  | C(10F)-N(6)-C(9F)  | 111.1(4)   |
| O(24)-Cu(6)-O(16)  | 99.67(11)  | C(10F)-N(6)-C(11F) | 109.8(4)   |
| O(22)-Cu(6)-O(16)  | 95.96(13)  | C(9F)-N(6)-C(11F)  | 109.3(4)   |
| O(6)-Cu(6)-O(16)   | 107.26(12) | C(10F)-N(6)-Cu(4)  | 110.2(3)   |
| N(5)-Cu(6)-O(16)   | 96.23(13)  | C(9F)-N(6)-Cu(4)   | 104.7(3)   |
| O(24)-Cu(6)-Ti(3)  | 39.47(8)   | C(11F)-N(6)-Cu(4)  | 111.6(3)   |
| O(22)-Cu(6)-Ti(3)  | 123.17(9)  | Cu(3)-O(1)-Cu(1)   | 115.96(14) |
| O(6)-Cu(6)-Ti(3)   | 42.90(8)   | Cu(3)-O(1)-Cu(2)   | 100.34(13) |
| N(5)-Cu(6)-Ti(3)   | 122.97(11) | Cu(1)-O(1)-Cu(2)   | 105.22(14) |
| O(16)-Cu(6)-Ti(3)  | 118.34(8)  | Cu(3)-O(1)-H(1)    | 116(3)     |
| C(11Z)-N(1)-C(10A) | 111.0(9)   | Cu(1)-O(1)-H(1)    | 103(3)     |
| C(11Z)-N(1)-C(9A)  | 82.9(6)    | Cu(2)-O(1)-H(1)    | 116(3)     |
| C(10A)-N(1)-C(9A)  | 114.5(5)   | C(8A)-O(2)-C(8Z)   | 17.0(9)    |
| C(11Z)-N(1)-C(11A) | 23.5(6)    | C(8A)-O(2)-Cu(1)   | 109.7(5)   |
| C(10A)-N(1)-C(11A) | 109.4(6)   | C(8Z)-O(2)-Cu(1)   | 109.2(8)   |
| C(9A)-N(1)-C(11A)  | 104.4(5)   | C(8A)-O(2)-Ti(1)   | 114.7(4)   |
| C(11Z)-N(1)-C(10Z) | 114.7(9)   | C(8Z)-O(2)-Ti(1)   | 125.8(9)   |
| C(9A)-N(1)-C(10Z)  | 134.8(6)   | Cu(1)-O(2)-Ti(1)   | 117.37(14) |
| C(11A)-N(1)-C(10Z) | 104.3(8)   | C(8B)-O(3)-Cu(2)   | 107.5(2)   |
| C(11Z)-N(1)-C(9Z)  | 110.7(7)   | C(8B)-O(3)-Ti(1)   | 123.1(3)   |
| C(10A)-N(1)-C(9Z)  | 80.7(6)    | Cu(2)-O(3)-Ti(1)   | 111.97(14) |
| C(9A)-N(1)-C(9Z)   | 37.6(4)    | C(8B)-O(3)-Cu(3)   | 127.8(3)   |
| C(11A)-N(1)-C(9Z)  | 134.1(5)   | Cu(2)-O(3)-Cu(3)   | 88.54(10)  |
| C(10Z)-N(1)-C(9Z)  | 98.6(6)    | Ti(1)-O(3)-Cu(3)   | 92.88(10)  |
| C(11Z)-N(1)-Cu(1)  | 121.8(7)   | C(8C)-O(4)-Cu(3)   | 108.0(3)   |
| C(10A)-N(1)-Cu(1)  | 119.4(4)   | C(8C)-O(4)-Ti(1)   | 122.3(2)   |
| C(9A)-N(1)-Cu(1)   | 100.1(3)   | Cu(3)-O(4)-Ti(1)   | 108.89(13) |
| C(11A)-N(1)-Cu(1)  | 107.7(4)   | C(8D)-O(5)-Cu(5)   | 110.8(3)   |
| C(10Z)-N(1)-Cu(1)  | 103.6(6)   | C(8D)-O(5)-Ti(2)   | 133.6(3)   |
| C(9Z)-N(1)-Cu(1)   | 104.6(5)   | Cu(5)-O(5)-Ti(2)   | 95.46(12)  |
| C(11B)-N(2)-C(10B) | 109.8(4)   | C(8E)-O(6)-Cu(6)   | 111.3(2)   |
| C(11B)-N(2)-C(9B)  | 111.2(4)   | C(8E)-O(6)-Ti(3)   | 136.0(3)   |
| C(10B)-N(2)-C(9B)  | 109.4(4)   | Cu(6)-O(6)-Ti(3)   | 95.42(11)  |
| C(11B)-N(2)-Cu(2)  | 108.9(3)   | C(8F)-O(7)-Cu(4)   | 112.4(3)   |
| C(10B)-N(2)-Cu(2)  | 110.1(3)   | C(8F)-O(7)-Ti(4)   | 131.9(3)   |
| C(9B)-N(2)-Cu(2)   | 107.3(3)   | Cu(4)-O(7)-Ti(4)   | 95.52(13)  |
| C(9C)-N(3)-C(10C)  | 111.5(4)   | C(1A)-O(8)-Cu(1)   | 130.1(3)   |
| C(9C)-N(3)-C(11C)  | 110.9(3)   | C(1A)-O(9)-Cu(2)   | 126.4(3)   |
| C(10C)-N(3)-C(11C) | 109.7(4)   | C(1B)-O(10)-Cu(2)  | 129.2(3)   |

|                   |            |                   |            |
|-------------------|------------|-------------------|------------|
| C(1B)-O(11)-Cu(3) | 123.9(3)   | O(3)-Ti(1)-Ti(3)  | 109.69(8)  |
| C(1C)-O(12)-C(1)  | 33.4(6)    | Ti(4)-Ti(1)-Ti(3) | 61.74(3)   |
| C(1C)-O(12)-Cu(1) | 124.7(4)   | O(29)-Ti(1)-Ti(2) | 21.68(8)   |
| C(1)-O(12)-Cu(1)  | 123.3(6)   | O(28)-Ti(1)-Ti(2) | 80.68(9)   |
| C(1D)-O(14)-Cu(5) | 121.9(3)   | O(27)-Ti(1)-Ti(2) | 80.22(9)   |
| C(1D)-O(15)-Ti(3) | 134.9(3)   | O(4)-Ti(1)-Ti(2)  | 106.08(8)  |
| C(1E)-O(16)-Cu(6) | 121.6(3)   | O(2)-Ti(1)-Ti(2)  | 107.90(9)  |
| C(1E)-O(17)-Ti(4) | 136.8(3)   | O(3)-Ti(1)-Ti(2)  | 167.59(8)  |
| C(1F)-O(18)-Cu(4) | 124.4(3)   | Ti(4)-Ti(1)-Ti(2) | 61.73(3)   |
| C(1F)-O(19)-Ti(2) | 133.8(3)   | Ti(3)-Ti(1)-Ti(2) | 61.68(2)   |
| C(1G)-O(20)-Cu(5) | 125.0(3)   | O(29)-Ti(2)-O(25) | 95.03(13)  |
| C(1G)-O(21)-Ti(3) | 131.2(3)   | O(29)-Ti(2)-O(26) | 94.55(12)  |
| C(1H)-O(22)-Cu(6) | 125.7(3)   | O(25)-Ti(2)-O(26) | 93.81(12)  |
| C(1H)-O(23)-Ti(4) | 130.4(3)   | O(29)-Ti(2)-O(5)  | 100.70(13) |
| C(1I)-O(30)-Cu(4) | 126.1(3)   | O(25)-Ti(2)-O(5)  | 162.96(12) |
| C(1I)-O(31)-Ti(2) | 132.4(3)   | O(26)-Ti(2)-O(5)  | 78.53(12)  |
| Ti(4)-O(24)-Cu(6) | 121.59(15) | O(29)-Ti(2)-O(19) | 91.59(12)  |
| Ti(4)-O(24)-Ti(3) | 133.51(15) | O(25)-Ti(2)-O(19) | 99.46(12)  |
| Cu(6)-O(24)-Ti(3) | 101.29(12) | O(26)-Ti(2)-O(19) | 164.83(13) |
| Ti(2)-O(25)-Ti(4) | 133.55(15) | O(5)-Ti(2)-O(19)  | 86.71(12)  |
| Ti(2)-O(25)-Cu(4) | 123.79(14) | O(29)-Ti(2)-O(31) | 175.22(13) |
| Ti(4)-O(25)-Cu(4) | 100.35(13) | O(25)-Ti(2)-O(31) | 82.90(12)  |
| Ti(3)-O(26)-Ti(2) | 133.21(15) | O(26)-Ti(2)-O(31) | 89.89(11)  |
| Ti(3)-O(26)-Cu(5) | 123.14(14) | O(5)-Ti(2)-O(31)  | 81.89(12)  |
| Ti(2)-O(26)-Cu(5) | 100.83(13) | O(19)-Ti(2)-O(31) | 84.52(11)  |
| Ti(3)-O(27)-Ti(1) | 134.99(15) | O(29)-Ti(2)-Cu(5) | 110.84(10) |
| Ti(4)-O(28)-Ti(1) | 135.22(16) | O(25)-Ti(2)-Cu(5) | 126.01(9)  |
| Ti(2)-O(29)-Ti(1) | 135.78(15) | O(26)-Ti(2)-Cu(5) | 39.84(8)   |
| O(29)-Ti(1)-O(28) | 96.01(12)  | O(5)-Ti(2)-Cu(5)  | 41.28(8)   |
| O(29)-Ti(1)-O(27) | 94.46(12)  | O(19)-Ti(2)-Cu(5) | 125.02(9)  |
| O(28)-Ti(1)-O(27) | 93.51(12)  | O(31)-Ti(2)-Cu(5) | 73.76(8)   |
| O(29)-Ti(1)-O(4)  | 90.17(12)  | O(29)-Ti(2)-Ti(1) | 22.54(9)   |
| O(28)-Ti(1)-O(4)  | 92.76(12)  | O(25)-Ti(2)-Ti(1) | 79.40(9)   |
| O(27)-Ti(1)-O(4)  | 171.78(11) | O(26)-Ti(2)-Ti(1) | 79.55(8)   |
| O(29)-Ti(1)-O(2)  | 92.18(12)  | O(5)-Ti(2)-Ti(1)  | 113.58(9)  |
| O(28)-Ti(1)-O(2)  | 171.42(12) | O(19)-Ti(2)-Ti(1) | 110.01(9)  |
| O(27)-Ti(1)-O(2)  | 88.40(12)  | O(31)-Ti(2)-Ti(1) | 158.66(8)  |
| O(4)-Ti(1)-O(2)   | 84.64(11)  | Cu(5)-Ti(2)-Ti(1) | 107.54(3)  |
| O(29)-Ti(1)-O(3)  | 170.25(11) | O(27)-Ti(3)-O(26) | 96.31(12)  |
| O(28)-Ti(1)-O(3)  | 89.09(12)  | O(27)-Ti(3)-O(24) | 95.18(12)  |
| O(27)-Ti(1)-O(3)  | 93.51(11)  | O(26)-Ti(3)-O(24) | 92.39(12)  |
| O(4)-Ti(1)-O(3)   | 81.27(11)  | O(27)-Ti(3)-O(6)  | 99.21(12)  |
| O(2)-Ti(1)-O(3)   | 82.43(12)  | O(26)-Ti(3)-O(6)  | 162.62(11) |
| O(29)-Ti(1)-Ti(4) | 80.21(9)   | O(24)-Ti(3)-O(6)  | 78.50(11)  |
| O(28)-Ti(1)-Ti(4) | 21.89(8)   | O(27)-Ti(3)-O(15) | 92.06(12)  |
| O(27)-Ti(1)-Ti(4) | 79.77(8)   | O(26)-Ti(3)-O(15) | 97.26(12)  |
| O(4)-Ti(1)-Ti(4)  | 107.75(8)  | O(24)-Ti(3)-O(15) | 167.24(11) |
| O(2)-Ti(1)-Ti(4)  | 165.32(9)  | O(6)-Ti(3)-O(15)  | 89.98(11)  |
| O(3)-Ti(1)-Ti(4)  | 106.78(8)  | O(27)-Ti(3)-O(21) | 175.48(12) |
| O(29)-Ti(1)-Ti(3) | 79.49(9)   | O(26)-Ti(3)-O(21) | 82.65(11)  |
| O(28)-Ti(1)-Ti(3) | 79.42(9)   | O(24)-Ti(3)-O(21) | 89.27(11)  |
| O(27)-Ti(1)-Ti(3) | 21.84(8)   | O(6)-Ti(3)-O(21)  | 82.47(11)  |
| O(4)-Ti(1)-Ti(3)  | 166.22(8)  | O(15)-Ti(3)-O(21) | 83.73(11)  |
| O(2)-Ti(1)-Ti(3)  | 104.68(9)  | O(27)-Ti(3)-Cu(6) | 109.92(10) |

|                   |            |                   |            |
|-------------------|------------|-------------------|------------|
| O(26)-Ti(3)-Cu(6) | 124.62(9)  | O(25)-Ti(4)-O(17) | 165.12(12) |
| O(24)-Ti(3)-Cu(6) | 39.24(8)   | O(7)-Ti(4)-O(17)  | 87.79(12)  |
| O(6)-Ti(3)-Cu(6)  | 41.68(8)   | O(28)-Ti(4)-O(23) | 174.78(12) |
| O(15)-Ti(3)-Cu(6) | 128.12(8)  | O(24)-Ti(4)-O(23) | 83.28(11)  |
| O(21)-Ti(3)-Cu(6) | 74.13(8)   | O(25)-Ti(4)-O(23) | 89.71(11)  |
| O(27)-Ti(3)-Ti(1) | 23.17(8)   | O(7)-Ti(4)-O(23)  | 82.57(11)  |
| O(26)-Ti(3)-Ti(1) | 80.09(9)   | O(17)-Ti(4)-O(23) | 83.57(12)  |
| O(24)-Ti(3)-Ti(1) | 79.46(8)   | O(28)-Ti(4)-Cu(4) | 111.65(9)  |
| O(6)-Ti(3)-Ti(1)  | 112.20(8)  | O(24)-Ti(4)-Cu(4) | 125.24(9)  |
| O(15)-Ti(3)-Ti(1) | 110.37(8)  | O(25)-Ti(4)-Cu(4) | 39.83(8)   |
| O(21)-Ti(3)-Ti(1) | 158.91(8)  | O(7)-Ti(4)-Cu(4)  | 41.37(8)   |
| Cu(6)-Ti(3)-Ti(1) | 106.20(4)  | O(17)-Ti(4)-Cu(4) | 125.29(9)  |
| O(28)-Ti(4)-O(24) | 95.08(12)  | O(23)-Ti(4)-Cu(4) | 73.18(8)   |
| O(28)-Ti(4)-O(25) | 95.33(12)  | O(28)-Ti(4)-Ti(1) | 22.89(9)   |
| O(24)-Ti(4)-O(25) | 93.14(12)  | O(24)-Ti(4)-Ti(1) | 80.25(9)   |
| O(28)-Ti(4)-O(7)  | 99.75(12)  | O(25)-Ti(4)-Ti(1) | 78.88(8)   |
| O(24)-Ti(4)-O(7)  | 163.39(12) | O(7)-Ti(4)-Ti(1)  | 111.35(9)  |
| O(25)-Ti(4)-O(7)  | 78.16(12)  | O(17)-Ti(4)-Ti(1) | 111.27(9)  |
| O(28)-Ti(4)-O(17) | 91.83(12)  | O(23)-Ti(4)-Ti(1) | 159.34(8)  |
| O(24)-Ti(4)-O(17) | 99.21(12)  | Cu(4)-Ti(4)-Ti(1) | 106.67(4)  |

Table 4. Anisotropic displacement parameters [ $\text{\AA}^2 \times 10^3$ ] for 06mz171m. The anisotropic displacement factor exponent takes the form:  $-2 \pi^2 [(h a^*)^2 U_{11} + \dots + 2 h k a^* b^* U_{12}]$

|        | U11   | U22   | U33    | U23   | U13   | U12    |
|--------|-------|-------|--------|-------|-------|--------|
| C(1A)  | 26(2) | 23(3) | 33(3)  | 3(2)  | 4(2)  | 1(2)   |
| C(2A)  | 18(2) | 29(3) | 31(2)  | 5(2)  | 4(2)  | -2(2)  |
| C(3A)  | 25(3) | 32(3) | 56(3)  | 11(2) | 7(2)  | -4(2)  |
| C(4A)  | 27(3) | 41(3) | 85(4)  | 38(3) | -4(3) | -5(2)  |
| C(5A)  | 24(3) | 39(3) | 96(5)  | 25(3) | 2(3)  | 2(2)   |
| C(6A)  | 22(3) | 45(3) | 77(4)  | 8(3)  | 16(3) | 0(2)   |
| C(7A)  | 35(3) | 34(3) | 41(3)  | 10(2) | 1(2)  | -1(2)  |
| C(8A)  | 11(7) | 20(3) | 23(3)  | 6(2)  | 2(4)  | 0(3)   |
| C(9A)  | 31(5) | 28(4) | 36(4)  | 17(4) | 15(4) | 8(4)   |
| C(10A) | 32(2) | 21(4) | 40(4)  | 5(3)  | 4(3)  | -5(3)  |
| C(11A) | 32(2) | 21(4) | 40(4)  | 5(3)  | 4(3)  | -5(3)  |
| C(8Z)  | 11(7) | 20(3) | 23(3)  | 6(2)  | 2(4)  | 0(3)   |
| C(9Z)  | 33(7) | 35(7) | 42(7)  | 28(6) | 4(6)  | 18(6)  |
| C(10Z) | 32(2) | 21(4) | 40(4)  | 5(3)  | 4(3)  | -5(3)  |
| C(11Z) | 32(2) | 21(4) | 40(4)  | 5(3)  | 4(3)  | -5(3)  |
| C(1B)  | 23(2) | 24(3) | 37(3)  | 3(2)  | 2(2)  | -2(2)  |
| C(2B)  | 32(3) | 25(3) | 35(3)  | 3(2)  | 2(2)  | -3(2)  |
| C(3B)  | 34(3) | 31(3) | 107(5) | 2(3)  | 8(3)  | -1(3)  |
| C(4B)  | 37(3) | 51(4) | 117(6) | 20(4) | 18(4) | -5(3)  |
| C(5B)  | 47(3) | 50(4) | 42(3)  | 5(3)  | 1(3)  | -29(3) |

|         |          |         |         |         |         |         |
|---------|----------|---------|---------|---------|---------|---------|
| C (6B)  | 82 (5)   | 42 (4)  | 72 (4)  | -30 (3) | 42 (4)  | -34 (3) |
| C (7B)  | 51 (3)   | 46 (4)  | 65 (4)  | -15 (3) | 35 (3)  | -18 (3) |
| C (8B)  | 33 (3)   | 40 (3)  | 29 (2)  | 17 (2)  | 9 (2)   | 2 (2)   |
| C (9B)  | 37 (3)   | 51 (3)  | 26 (2)  | 12 (2)  | 9 (2)   | 1 (2)   |
| C (10B) | 60 (3)   | 39 (3)  | 34 (3)  | -4 (2)  | 16 (3)  | 4 (3)   |
| C (11B) | 36 (3)   | 54 (4)  | 35 (3)  | 10 (2)  | 17 (2)  | -2 (3)  |
| C (1)   | 33 (5)   | 21 (6)  | 40 (4)  | -9 (4)  | -4 (3)  | -10 (4) |
| C (2)   | 54 (3)   | 28 (4)  | 37 (4)  | 10 (3)  | 6 (3)   | -4 (3)  |
| C (3)   | 66 (5)   | 74 (7)  | 28 (3)  | 12 (4)  | -4 (3)  | 0 (5)   |
| C (4)   | 73 (8)   | 93 (13) | 41 (5)  | 3 (8)   | -5 (5)  | -3 (7)  |
| C (5)   | 163 (13) | 80 (11) | 28 (4)  | 28 (5)  | 11 (6)  | 20 (10) |
| C (6)   | 146 (9)  | 36 (4)  | 40 (6)  | 13 (4)  | 39 (6)  | 18 (5)  |
| C (7)   | 76 (5)   | 22 (7)  | 33 (7)  | 18 (3)  | 22 (4)  | 6 (4)   |
| C (1C)  | 33 (5)   | 21 (6)  | 40 (4)  | -9 (4)  | -4 (3)  | -10 (4) |
| C (2C)  | 54 (3)   | 28 (4)  | 37 (4)  | 10 (3)  | 6 (3)   | -4 (3)  |
| C (3C)  | 66 (5)   | 74 (7)  | 28 (3)  | 12 (4)  | -4 (3)  | 0 (5)   |
| C (4C)  | 73 (8)   | 93 (13) | 41 (5)  | 3 (8)   | -5 (5)  | -3 (7)  |
| C (5C)  | 163 (13) | 80 (11) | 28 (4)  | 28 (5)  | 11 (6)  | 20 (10) |
| C (6C)  | 146 (9)  | 36 (4)  | 40 (6)  | 13 (4)  | 39 (6)  | 18 (5)  |
| C (7C)  | 76 (5)   | 22 (7)  | 33 (7)  | 18 (3)  | 22 (4)  | 6 (4)   |
| C (8C)  | 20 (2)   | 46 (3)  | 31 (3)  | -2 (2)  | 6 (2)   | -4 (2)  |
| C (9C)  | 27 (2)   | 36 (3)  | 29 (2)  | -5 (2)  | 2 (2)   | 5 (2)   |
| C (10C) | 61 (4)   | 41 (3)  | 36 (3)  | 8 (2)   | 12 (3)  | 5 (3)   |
| C (11C) | 37 (3)   | 37 (3)  | 35 (3)  | -13 (2) | 10 (2)  | -4 (2)  |
| C (1D)  | 24 (2)   | 23 (2)  | 22 (2)  | 0 (2)   | 1 (2)   | 1 (2)   |
| C (2D)  | 36 (3)   | 37 (3)  | 26 (2)  | 13 (2)  | 6 (2)   | 12 (2)  |
| C (3D)  | 86 (5)   | 91 (5)  | 92 (5)  | 63 (4)  | 60 (4)  | 60 (4)  |
| C (4D)  | 144 (8)  | 101 (7) | 141 (8) | 87 (6)  | 87 (7)  | 85 (6)  |
| C (5D)  | 94 (6)   | 140 (8) | 102 (6) | 80 (6)  | 59 (5)  | 79 (6)  |
| C (6D)  | 41 (3)   | 72 (4)  | 55 (4)  | 25 (3)  | 17 (3)  | 20 (3)  |
| C (7D)  | 25 (2)   | 35 (3)  | 32 (3)  | 0 (2)   | 1 (2)   | -3 (2)  |
| C (8D)  | 53 (3)   | 37 (3)  | 28 (3)  | 10 (2)  | 5 (2)   | -16 (2) |
| C (9D)  | 74 (4)   | 36 (3)  | 31 (3)  | 15 (2)  | 4 (3)   | -9 (3)  |
| C (10D) | 49 (3)   | 39 (3)  | 39 (3)  | 12 (2)  | 10 (2)  | -13 (3) |
| C (11D) | 51 (3)   | 26 (3)  | 57 (3)  | 13 (3)  | 10 (3)  | -1 (2)  |
| C (1E)  | 27 (2)   | 32 (3)  | 29 (2)  | 12 (2)  | 4 (2)   | 3 (2)   |
| C (2E)  | 50 (3)   | 28 (3)  | 49 (3)  | 14 (2)  | 16 (3)  | 5 (2)   |
| C (3E)  | 112 (6)  | 37 (4)  | 86 (5)  | 27 (3)  | 58 (4)  | 20 (4)  |
| C (4E)  | 197 (10) | 55 (5)  | 115 (7) | 47 (5)  | 91 (7)  | 10 (6)  |
| C (5E)  | 173 (9)  | 32 (4)  | 142 (8) | 31 (5)  | 82 (7)  | 12 (5)  |
| C (6E)  | 106 (6)  | 28 (3)  | 88 (5)  | 10 (3)  | 38 (4)  | 12 (3)  |
| C (7E)  | 50 (3)   | 25 (3)  | 55 (3)  | 13 (2)  | 18 (3)  | 5 (2)   |
| C (8E)  | 29 (2)   | 33 (3)  | 21 (2)  | 4 (2)   | 6 (2)   | 4 (2)   |
| C (9E)  | 38 (3)   | 51 (3)  | 26 (2)  | 8 (2)   | 15 (2)  | 10 (2)  |
| C (10E) | 40 (3)   | 55 (4)  | 25 (3)  | -5 (2)  | 5 (2)   | 6 (3)   |
| C (11E) | 76 (4)   | 52 (4)  | 34 (3)  | 25 (3)  | 20 (3)  | 21 (3)  |
| C (1F)  | 30 (3)   | 30 (3)  | 25 (2)  | -2 (2)  | 8 (2)   | -19 (2) |
| C (2F)  | 66 (4)   | 32 (3)  | 22 (2)  | -1 (2)  | 16 (2)  | -19 (3) |
| C (3F)  | 149 (7)  | 33 (3)  | 45 (3)  | 7 (3)   | 56 (4)  | 12 (4)  |
| C (4F)  | 205 (9)  | 35 (4)  | 57 (4)  | 8 (3)   | 80 (5)  | 2 (5)   |
| C (5F)  | 174 (8)  | 67 (5)  | 29 (3)  | -7 (3)  | 43 (4)  | -30 (5) |
| C (6F)  | 101 (5)  | 64 (5)  | 37 (3)  | 16 (3)  | -1 (3)  | -28 (4) |
| C (7F)  | 57 (4)   | 63 (4)  | 24 (3)  | 9 (3)   | 6 (2)   | -20 (3) |
| C (8F)  | 40 (3)   | 34 (3)  | 38 (3)  | 8 (2)   | 13 (2)  | 15 (2)  |
| C (9F)  | 48 (3)   | 41 (3)  | 42 (3)  | 4 (2)   | 17 (2)  | 17 (3)  |
| C (10F) | 54 (4)   | 66 (5)  | 82 (5)  | -9 (4)  | -16 (3) | 25 (3)  |
| C (11F) | 61 (4)   | 55 (4)  | 88 (5)  | 2 (4)   | 45 (4)  | 19 (3)  |

|        |        |        |        |         |        |         |
|--------|--------|--------|--------|---------|--------|---------|
| C (1G) | 25 (2) | 22 (2) | 20 (2) | -3 (2)  | 7 (2)  | 4 (2)   |
| C (2G) | 17 (2) | 42 (3) | 16 (2) | 4 (2)   | 3 (2)  | -5 (2)  |
| C (3G) | 26 (2) | 44 (3) | 31 (3) | 0 (2)   | 13 (2) | -4 (2)  |
| C (4G) | 34 (3) | 56 (4) | 36 (3) | -12 (3) | 12 (2) | -20 (3) |
| C (5G) | 36 (3) | 83 (5) | 37 (3) | 12 (3)  | -9 (2) | -19 (3) |
| C (6G) | 38 (3) | 76 (5) | 47 (3) | 34 (3)  | -6 (3) | -12 (3) |
| C (7G) | 30 (3) | 50 (3) | 32 (3) | 12 (2)  | -2 (2) | -6 (2)  |
| C (1H) | 28 (2) | 28 (3) | 28 (2) | 11 (2)  | 2 (2)  | 6 (2)   |
| C (2H) | 29 (2) | 36 (3) | 21 (2) | 4 (2)   | 0 (2)  | 5 (2)   |
| C (3H) | 31 (3) | 51 (3) | 29 (3) | 6 (2)   | 7 (2)  | 8 (2)   |
| C (4H) | 35 (3) | 81 (4) | 28 (3) | 10 (3)  | -6 (2) | 12 (3)  |
| C (5H) | 31 (3) | 79 (5) | 41 (3) | 6 (3)   | -7 (2) | -9 (3)  |
| C (6H) | 34 (3) | 72 (4) | 36 (3) | 5 (3)   | 5 (2)  | -16 (3) |
| C (7H) | 38 (3) | 52 (4) | 29 (3) | -1 (2)  | -3 (2) | -3 (3)  |
| C (1I) | 27 (3) | 38 (3) | 25 (2) | -1 (2)  | 9 (2)  | -8 (2)  |
| C (2I) | 26 (2) | 30 (3) | 30 (2) | 0 (2)   | 7 (2)  | -1 (2)  |
| C (3I) | 22 (2) | 42 (3) | 32 (3) | -4 (2)  | 8 (2)  | -3 (2)  |
| C (4I) | 34 (3) | 56 (4) | 34 (3) | -12 (3) | 9 (2)  | 3 (3)   |
| C (5I) | 25 (3) | 56 (4) | 42 (3) | -16 (3) | -1 (2) | -2 (2)  |
| C (6I) | 17 (2) | 56 (4) | 51 (3) | -7 (3)  | 5 (2)  | 1 (2)   |
| C (7I) | 26 (3) | 49 (3) | 38 (3) | -6 (2)  | 8 (2)  | 1 (2)   |
| Cu (1) | 26 (1) | 30 (1) | 25 (1) | 7 (1)   | 4 (1)  | -1 (1)  |
| Cu (2) | 24 (1) | 27 (1) | 24 (1) | 5 (1)   | 4 (1)  | 1 (1)   |
| Cu (3) | 25 (1) | 23 (1) | 31 (1) | -2 (1)  | 8 (1)  | -3 (1)  |
| Cu (4) | 25 (1) | 27 (1) | 26 (1) | -2 (1)  | 8 (1)  | 0 (1)   |
| Cu (5) | 27 (1) | 21 (1) | 22 (1) | 5 (1)   | 3 (1)  | -3 (1)  |
| Cu (6) | 26 (1) | 24 (1) | 18 (1) | 4 (1)   | 6 (1)  | 3 (1)   |
| N (1)  | 56 (3) | 34 (3) | 34 (2) | 8 (2)   | 23 (2) | -8 (2)  |
| N (2)  | 32 (2) | 35 (2) | 25 (2) | 3 (2)   | 7 (2)  | 6 (2)   |
| N (3)  | 35 (2) | 24 (2) | 21 (2) | -3 (2)  | 6 (2)  | -5 (2)  |
| N (4)  | 37 (2) | 25 (2) | 32 (2) | 6 (2)   | 4 (2)  | -6 (2)  |
| N (5)  | 29 (2) | 34 (2) | 20 (2) | 7 (2)   | 4 (2)  | 8 (2)   |
| N (6)  | 31 (2) | 40 (3) | 50 (3) | -3 (2)  | 15 (2) | 5 (2)   |
| O (1)  | 23 (2) | 28 (2) | 20 (2) | 3 (1)   | -3 (1) | -5 (1)  |
| O (2)  | 29 (2) | 22 (2) | 28 (2) | 5 (1)   | -2 (1) | -1 (1)  |
| O (3)  | 22 (2) | 25 (2) | 24 (2) | 1 (1)   | 5 (1)  | -5 (1)  |
| O (4)  | 22 (2) | 29 (2) | 24 (2) | 0 (1)   | 6 (1)  | 0 (1)   |
| O (5)  | 40 (2) | 23 (2) | 20 (2) | 7 (1)   | 5 (1)  | -5 (1)  |
| O (6)  | 22 (2) | 21 (2) | 17 (1) | 1 (1)   | 5 (1)  | 1 (1)   |
| O (7)  | 28 (2) | 24 (2) | 24 (2) | 3 (1)   | 11 (1) | 6 (1)   |
| O (8)  | 28 (2) | 41 (2) | 43 (2) | 17 (2)  | 12 (2) | 6 (2)   |
| O (9)  | 32 (2) | 32 (2) | 31 (2) | 9 (2)   | 6 (1)  | 5 (1)   |
| O (10) | 27 (2) | 23 (2) | 47 (2) | -3 (2)  | 11 (2) | -5 (1)  |
| O (11) | 32 (2) | 29 (2) | 52 (2) | -3 (2)  | 14 (2) | -2 (2)  |
| O (12) | 56 (2) | 47 (2) | 25 (2) | 8 (2)   | 13 (2) | 11 (2)  |
| O (13) | 42 (4) | 65 (5) | 34 (3) | -8 (3)  | 4 (3)  | 10 (3)  |
| O (14) | 30 (2) | 30 (2) | 27 (2) | 12 (1)  | 6 (1)  | 3 (1)   |
| O (15) | 26 (2) | 23 (2) | 24 (2) | 4 (1)   | 6 (1)  | 1 (1)   |
| O (16) | 42 (2) | 22 (2) | 32 (2) | 5 (1)   | 16 (2) | 2 (2)   |
| O (17) | 33 (2) | 22 (2) | 26 (2) | 5 (1)   | 7 (1)  | 2 (1)   |
| O (18) | 50 (2) | 33 (2) | 26 (2) | 1 (2)   | 16 (2) | -8 (2)  |
| O (19) | 34 (2) | 30 (2) | 21 (2) | 2 (1)   | 5 (1)  | -7 (1)  |
| O (20) | 38 (2) | 21 (2) | 20 (2) | 4 (1)   | 1 (1)  | -5 (1)  |
| O (21) | 29 (2) | 24 (2) | 19 (2) | 3 (1)   | 2 (1)  | -5 (1)  |
| O (22) | 29 (2) | 42 (2) | 25 (2) | 11 (2)  | 8 (1)  | 5 (2)   |
| O (23) | 25 (2) | 30 (2) | 23 (2) | 1 (1)   | 3 (1)  | 4 (1)   |
| O (30) | 26 (2) | 31 (2) | 44 (2) | -7 (2)  | 13 (2) | -3 (1)  |

|       |       |       |       |        |       |       |
|-------|-------|-------|-------|--------|-------|-------|
| O(31) | 26(2) | 25(2) | 25(2) | 3(1)   | 3(1)  | -5(1) |
| O(32) | 84(8) | 56(7) | 19(5) | -12(4) | -3(4) | 31(6) |
| O(24) | 22(2) | 22(2) | 20(1) | 3(1)   | 7(1)  | -2(1) |
| O(25) | 23(2) | 24(2) | 17(1) | 1(1)   | 7(1)  | 0(1)  |
| O(26) | 25(2) | 19(2) | 20(1) | 4(1)   | 4(1)  | -3(1) |
| O(27) | 19(1) | 21(2) | 21(1) | 2(1)   | 4(1)  | 1(1)  |
| O(28) | 25(2) | 23(2) | 21(2) | 1(1)   | 6(1)  | -2(1) |
| O(29) | 26(2) | 21(2) | 20(1) | 6(1)   | 0(1)  | -4(1) |
| Ti(1) | 21(1) | 21(1) | 22(1) | 3(1)   | 0(1)  | -2(1) |
| Ti(2) | 24(1) | 23(1) | 18(1) | 3(1)   | 4(1)  | -4(1) |
| Ti(3) | 22(1) | 19(1) | 19(1) | 3(1)   | 5(1)  | 0(1)  |
| Ti(4) | 23(1) | 22(1) | 18(1) | 2(1)   | 5(1)  | 2(1)  |

---

Table 5. Hydrogen coordinates ( $\times 10^4$ ) and isotropic displacement parameters ( $\text{\AA}^2 \times 10^3$ ) for 06mz171m.

|        | x    | y     | z    | U(eq) |
|--------|------|-------|------|-------|
| H(3A)  | 5298 | 4045  | -60  | 46    |
| H(4A)  | 3979 | 4492  | -276 | 59    |
| H(5A)  | 2967 | 4183  | 269  | 63    |
| H(6A)  | 3263 | 3476  | 1066 | 58    |
| H(7A)  | 4598 | 3084  | 1323 | 44    |
| H(8A1) | 8964 | 4224  | 1520 | 22    |
| H(8A2) | 8123 | 4353  | 1794 | 22    |
| H(9A1) | 7390 | 4458  | 821  | 35    |
| H(9A2) | 8246 | 4991  | 907  | 35    |
| H(10A) | 9116 | 3662  | -191 | 48    |
| H(10B) | 9391 | 3805  | 563  | 48    |
| H(10C) | 9207 | 4544  | 241  | 48    |
| H(11A) | 7841 | 4683  | -304 | 48    |
| H(11B) | 7080 | 4128  | -222 | 48    |
| H(11C) | 7704 | 3771  | -678 | 48    |
| H(8Z1) | 8362 | 4331  | 1902 | 22    |
| H(8Z2) | 7524 | 4237  | 1376 | 22    |
| H(9Z1) | 9185 | 4246  | 1099 | 40    |
| H(9Z2) | 8586 | 4946  | 1035 | 40    |
| H(10T) | 8883 | 3356  | -389 | 48    |
| H(10U) | 9344 | 3414  | 326  | 48    |
| H(10V) | 9331 | 4185  | 29   | 48    |
| H(11T) | 8091 | 4875  | -26  | 48    |
| H(11U) | 7276 | 4549  | 180  | 48    |
| H(11V) | 7536 | 4117  | -473 | 48    |
| H(3B)  | 4868 | 318   | 1042 | 72    |
| H(4B)  | 3901 | -761  | 839  | 81    |
| H(5B)  | 4262 | -2044 | 463  | 59    |
| H(6B)  | 5597 | -2214 | 274  | 84    |
| H(7B)  | 6547 | -1112 | 449  | 67    |
| H(8B1) | 8545 | 1595  | 2584 | 39    |
| H(8B2) | 7623 | 1206  | 2279 | 39    |



|        |       |       |       |     |
|--------|-------|-------|-------|-----|
| H(9B1) | 8080  | 2796  | 2975  | 44  |
| H(9B2) | 7485  | 2150  | 3152  | 44  |
| H(10D) | 6432  | 3698  | 2410  | 67  |
| H(10E) | 7424  | 3765  | 2562  | 67  |
| H(10F) | 6909  | 3650  | 3099  | 67  |
| H(11D) | 6063  | 2423  | 2955  | 61  |
| H(11E) | 6156  | 1672  | 2408  | 61  |
| H(11F) | 5669  | 2401  | 2231  | 61  |
| H(3)   | 6359  | 2030  | -1583 | 69  |
| H(4C)  | 6059  | 1716  | -2695 | 88  |
| H(5)   | 7027  | 1108  | -3273 | 106 |
| H(6)   | 8294  | 814   | -2738 | 85  |
| H(7)   | 8593  | 1128  | -1626 | 48  |
| H(3C)  | 6299  | 1763  | -1516 | 69  |
| H(4C1) | 5777  | 1127  | -2574 | 88  |
| H(5C)  | 6688  | 696   | -3267 | 106 |
| H(6C)  | 8120  | 900   | -2903 | 85  |
| H(7C)  | 8642  | 1536  | -1846 | 48  |
| H(8C1) | 10049 | 1812  | 686   | 41  |
| H(8C2) | 9384  | 1317  | 96    | 41  |
| H(9C1) | 10005 | 380   | 592   | 39  |
| H(9C2) | 9905  | 873   | 1280  | 39  |
| H(10G) | 8250  | -410  | 1232  | 69  |
| H(10H) | 8922  | 247   | 1692  | 69  |
| H(10I) | 9217  | -530  | 1271  | 69  |
| H(11G) | 8975  | -735  | 130   | 59  |
| H(11H) | 8686  | -32   | -209  | 59  |
| H(11I) | 8033  | -513  | 66    | 59  |
| H(3D)  | 8720  | 6809  | 2737  | 91  |
| H(4D)  | 7648  | 7567  | 2999  | 132 |
| H(5D)  | 6607  | 7037  | 3451  | 116 |
| H(6D)  | 6690  | 5755  | 3631  | 63  |
| H(7D)  | 7851  | 5087  | 3489  | 39  |
| H(8D1) | 11067 | 5164  | 939   | 48  |
| H(8D2) | 11859 | 5200  | 1489  | 48  |
| H(9D1) | 11510 | 6514  | 1543  | 56  |
| H(9D2) | 10557 | 6266  | 1541  | 56  |
| H(10J) | 12467 | 6847  | 2501  | 63  |
| H(10K) | 12477 | 5911  | 2464  | 63  |
| H(10L) | 12335 | 6498  | 3102  | 63  |
| H(11J) | 11067 | 7093  | 3149  | 67  |
| H(11K) | 10343 | 6948  | 2538  | 67  |
| H(11L) | 11177 | 7474  | 2559  | 67  |
| H(3E)  | 9380  | 442   | 4207  | 85  |
| H(4E)  | 9075  | -872  | 4228  | 133 |
| H(5E)  | 9299  | -1905 | 3399  | 129 |
| H(6E)  | 9786  | -1585 | 2528  | 86  |
| H(7E)  | 10176 | -264  | 2541  | 50  |
| H(8E1) | 8670  | 4058  | 4331  | 33  |
| H(8E2) | 9608  | 4432  | 4595  | 33  |
| H(9E1) | 9294  | 3646  | 5291  | 45  |
| H(9E2) | 8952  | 2907  | 4710  | 45  |
| H(10M) | 10711 | 3957  | 5679  | 63  |
| H(10N) | 10826 | 4180  | 5024  | 63  |
| H(10O) | 11392 | 3555  | 5299  | 63  |
| H(11M) | 10207 | 2613  | 5662  | 75  |
| H(11N) | 10865 | 2260  | 5236  | 75  |

|        |           |           |          |     |
|--------|-----------|-----------|----------|-----|
| H(11O) | 9899      | 1988      | 5001     | 75  |
| H(3F)  | 12385     | 1923      | -160     | 85  |
| H(4F)  | 12488     | 1945      | -1196    | 112 |
| H(5F)  | 11736     | 2818      | -1695    | 109 |
| H(6F)  | 10913     | 3704      | -1165    | 83  |
| H(7F)  | 10872     | 3723      | -90      | 59  |
| H(8F1) | 11444     | 199       | 2023     | 44  |
| H(8F2) | 12108     | 762       | 2582     | 44  |
| H(9F1) | 12850     | 177       | 1791     | 51  |
| H(9F2) | 12200     | 426       | 1247     | 51  |
| H(10P) | 13331     | 1506      | 2750     | 111 |
| H(10Q) | 13923     | 2011      | 2443     | 111 |
| H(10R) | 13984     | 1073      | 2356     | 111 |
| H(11P) | 13762     | 923       | 1195     | 99  |
| H(11Q) | 13720     | 1865      | 1301     | 99  |
| H(11R) | 12974     | 1281      | 850      | 99  |
| H(3G)  | 12172     | 6575      | 4452     | 41  |
| H(4G)  | 13306     | 6878      | 5296     | 55  |
| H(5G)  | 13887     | 5879      | 5732     | 66  |
| H(6G)  | 13365     | 4563      | 5327     | 63  |
| H(7G)  | 12170     | 4260      | 4539     | 46  |
| H(3H)  | 12768     | 2520      | 5059     | 45  |
| H(4H)  | 14167     | 2807      | 5559     | 59  |
| H(5H)  | 15137     | 3193      | 4997     | 64  |
| H(6H)  | 14749     | 3229      | 3927     | 59  |
| H(7H)  | 13363     | 2884      | 3428     | 51  |
| H(3I)  | 12836     | 5039      | 3305     | 40  |
| H(4I)  | 13921     | 5774      | 4057     | 53  |
| H(5I)  | 15283     | 5532      | 3986     | 55  |
| H(6I)  | 15569     | 4557      | 3167     | 53  |
| H(7I)  | 14498     | 3740      | 2454     | 48  |
| H(1)   | 6814 (18) | 1780 (30) | 338 (16) | 30  |

---

## Numerical data for Complex 2

Table 2. Atomic coordinates [ $\times 10^4$ ] and equivalent isotropic displacement parameters [ $\text{\AA}^2 \times 10^3$ ] for 06mz069m. U(eq) is defined as one third of the trace of the orthogonalized  $U_{ij}$  tensor.

|        | x        | y        | z       | U(eq)  |
|--------|----------|----------|---------|--------|
| C(1)   | 7850(2)  | 5005(2)  | 6580(1) | 40(1)  |
| C(2)   | 7379(2)  | 5432(2)  | 6570(1) | 46(1)  |
| C(3)   | 6239(2)  | 5354(3)  | 6791(1) | 61(1)  |
| C(4)   | 7488(2)  | 5998(2)  | 7010(1) | 48(1)  |
| C(5)   | 6796(2)  | 5877(2)  | 5762(1) | 36(1)  |
| C(6)   | 7562(2)  | 6578(2)  | 5671(1) | 40(1)  |
| C(7)   | 8804(2)  | 6932(2)  | 5457(1) | 47(1)  |
| C(8)   | 7589(2)  | 6126(2)  | 5223(1) | 42(1)  |
| C(9)   | 5559(2)  | 3858(2)  | 5293(1) | 28(1)  |
| C(10)  | 5703(2)  | 4105(2)  | 5007(1) | 32(1)  |
| C(11)  | 6436(2)  | 4300(2)  | 4901(1) | 42(1)  |
| C(12)  | 6605(3)  | 4496(3)  | 4637(1) | 60(1)  |
| C(13)  | 6043(3)  | 4529(2)  | 4479(1) | 63(1)  |
| C(14)  | 5334(3)  | 4363(2)  | 4582(1) | 56(1)  |
| C(15)  | 5136(2)  | 4132(2)  | 4848(1) | 41(1)  |
| C(16)  | 4346(2)  | 3950(2)  | 4956(1) | 57(1)  |
| C(10B) | 5459(8)  | 4150(7)  | 5049(1) | 32(1)  |
| C(11B) | 4826(10) | 4184(8)  | 4942(1) | 42(1)  |
| C(12B) | 4877(13) | 4479(11) | 4688(1) | 60(1)  |
| C(13B) | 5561(14) | 4740(11) | 4541(1) | 63(1)  |
| C(14B) | 6194(12) | 4706(10) | 4648(2) | 56(1)  |
| C(15B) | 6143(10) | 4411(8)  | 4902(2) | 41(1)  |
| C(16B) | 6806(8)  | 4306(8)  | 5006(2) | 57(1)  |
| C(17)  | 4603(2)  | 3789(2)  | 5958(1) | 31(1)  |
| C(18)  | 4196(1)  | 4167(2)  | 6097(1) | 38(1)  |
| C(19)  | 4606(2)  | 4692(2)  | 6297(1) | 70(1)  |
| C(20)  | 4268(5)  | 5044(4)  | 6445(1) | 103(2) |
| C(21)  | 3517(4)  | 4871(4)  | 6384(1) | 99(2)  |
| C(22)  | 3117(3)  | 4375(3)  | 6179(1) | 76(2)  |
| C(23)  | 3443(2)  | 4005(2)  | 6030(1) | 48(1)  |
| C(24)  | 2992(2)  | 3513(2)  | 5808(1) | 64(1)  |
| Cu(1)  | 6802(1)  | 4320(1)  | 6988(1) | 32(1)  |
| C(25)  | 5451(3)  | 3862(3)  | 7306(1) | 51(1)  |
| O(11)  | 6149(2)  | 4386(2)  | 7260(1) | 49(1)  |
| O(12)  | 5097(2)  | 3170(2)  | 7216(1) | 51(1)  |
| C(26)  | 5030(2)  | 4117(2)  | 7489(1) | 57(1)  |
| C(27)  | 5269(2)  | 4290(2)  | 7751(1) | 71(2)  |
| C(28)  | 4886(2)  | 4543(2)  | 7921(1) | 78(2)  |
| C(29)  | 4263(2)  | 4622(2)  | 7829(1) | 77(2)  |
| C(30)  | 4024(2)  | 4448(2)  | 7567(1) | 65(1)  |
| C(31)  | 4407(2)  | 4196(2)  | 7397(1) | 63(1)  |
| C(32)  | 4101(4)  | 3963(5)  | 7115(1) | 80(2)  |
| Cu(1B) | 6538(3)  | 4209(2)  | 6874(1) | 32(1)  |
| C(25B) | 5230(20) | 3820(30) | 7219(6) | 51(1)  |
| O(11B) | 5795(14) | 4294(14) | 7093(5) | 49(1)  |
| O(12B) | 5200(20) | 3110(20) | 7281(7) | 51(1)  |

|        |           |           |          |        |
|--------|-----------|-----------|----------|--------|
| C(26B) | 4689 (16) | 4084 (17) | 7303 (6) | 57 (1) |
| C(27B) | 4210 (20) | 4040 (20) | 7094 (5) | 71 (2) |
| C(28B) | 3669 (19) | 4300 (20) | 7130 (6) | 78 (2) |
| C(29B) | 3608 (16) | 4585 (19) | 7374 (7) | 77 (2) |
| C(30B) | 4090 (20) | 4620 (20) | 7582 (5) | 65 (1) |
| C(31B) | 4627 (17) | 4374 (18) | 7547 (5) | 63 (1) |
| C(32B) | 5140 (40) | 4400 (40) | 7776 (8) | 80 (2) |
| O(3)   | 6667      | 3333      | 7115 (1) | 33 (1) |
| Ti(2)  | 6292 (1)  | 4110 (1)  | 5868 (1) | 23 (1) |
| Ti(1)  | 6667      | 3333      | 6408 (1) | 28 (1) |
| Cu(2)  | 7814 (1)  | 5299 (1)  | 5646 (1) | 27 (1) |
| N(1)   | 6995 (2)  | 5350 (2)  | 6830 (1) | 40 (1) |
| N(2)   | 7974 (2)  | 6315 (1)  | 5486 (1) | 35 (1) |
| O(1)   | 7338 (1)  | 4226 (1)  | 6674 (1) | 31 (1) |
| O(2)   | 6966 (1)  | 5298 (1)  | 5853 (1) | 28 (1) |
| O(5)   | 6376 (1)  | 3955 (1)  | 6214 (1) | 26 (1) |
| O(6)   | 7295 (1)  | 4239 (1)  | 5777 (1) | 23 (1) |
| O(7)   | 8317 (1)  | 5080 (1)  | 5345 (1) | 33 (1) |
| O(8)   | 8872 (1)  | 5786 (1)  | 5896 (1) | 35 (1) |
| O(9)   | 6095 (1)  | 4274 (1)  | 5453 (1) | 28 (1) |
| O(10)  | 5340 (1)  | 4236 (1)  | 5925 (1) | 33 (1) |

All esds (except the esd in the dihedral angle between two l.s. planes) are estimated using the full covariance matrix. The cell esds are taken into account individually in the estimation of esds in distances, angles and torsion angles; correlations between esds in cell parameters are only used when they are defined by crystal symmetry. An approximate (isotropic) treatment of cell esds is used for estimating esds involving l.s. planes.

Table 3. Bond lengths [Å] and angles [deg] for 06mz069m.

|            |           |             |           |
|------------|-----------|-------------|-----------|
| C(1)-O(1)  | 1.431 (4) | C(5)-H(5B)  | 0.9900    |
| C(1)-C(2)  | 1.532 (5) | C(6)-N(2)   | 1.487 (4) |
| C(1)-H(1A) | 0.9900    | C(6)-H(6A)  | 0.9900    |
| C(1)-H(1B) | 0.9900    | C(6)-H(6B)  | 0.9900    |
| C(2)-N(1)  | 1.484 (4) | C(7)-N(2)   | 1.475 (4) |
| C(2)-H(2A) | 0.9900    | C(7)-H(7A)  | 0.9800    |
| C(2)-H(2B) | 0.9900    | C(7)-H(7B)  | 0.9800    |
| C(3)-N(1)  | 1.503 (5) | C(7)-H(7C)  | 0.9800    |
| C(3)-H(3A) | 0.9800    | C(8)-N(2)   | 1.484 (4) |
| C(3)-H(3B) | 0.9800    | C(8)-H(8A)  | 0.9800    |
| C(3)-H(3C) | 0.9800    | C(8)-H(8B)  | 0.9800    |
| C(4)-N(1)  | 1.469 (4) | C(8)-H(8C)  | 0.9800    |
| C(4)-H(4A) | 0.9800    | C(9)-O(9)   | 1.254 (3) |
| C(4)-H(4B) | 0.9800    | C(9)-O(7)#1 | 1.267 (3) |
| C(4)-H(4C) | 0.9800    | C(9)-C(10B) | 1.417 (9) |
| C(5)-O(2)  | 1.415 (3) | C(9)-C(10)  | 1.508 (4) |
| C(5)-C(6)  | 1.520 (4) | C(10)-C(15) | 1.396 (4) |
| C(5)-H(5A) | 0.9900    | C(10)-C(11) | 1.399 (5) |

|               |            |                |            |
|---------------|------------|----------------|------------|
| C(11)-C(12)   | 1.384(5)   | C(28)-C(29)    | 1.3900     |
| C(11)-H(11)   | 0.9500     | C(28)-H(28)    | 0.9500     |
| C(12)-C(13)   | 1.391(7)   | C(29)-C(30)    | 1.3900     |
| C(12)-H(12)   | 0.9500     | C(29)-H(29)    | 0.9500     |
| C(13)-C(14)   | 1.368(7)   | C(30)-C(31)    | 1.3900     |
| C(13)-H(13)   | 0.9500     | C(30)-H(30)    | 0.9500     |
| C(14)-C(15)   | 1.405(5)   | C(31)-C(32)    | 1.523(5)   |
| C(14)-H(14)   | 0.9500     | C(32)-H(32A)   | 0.9800     |
| C(15)-C(16)   | 1.515(5)   | C(32)-H(32B)   | 0.9800     |
| C(16)-H(16A)  | 0.9800     | C(32)-H(32C)   | 0.9800     |
| C(16)-H(16B)  | 0.9800     | Cu(1B)-O(1)    | 1.857(4)   |
| C(16)-H(16C)  | 0.9800     | Cu(1B)-O(11B)  | 1.905(15)  |
| C(10B)-C(11B) | 1.3900     | Cu(1B)-N(1)    | 1.971(5)   |
| C(10B)-C(15B) | 1.3900     | Cu(1B)-O(1)#1  | 2.165(5)   |
| C(11B)-C(12B) | 1.3900     | Cu(1B)-O(3)    | 2.225(5)   |
| C(11B)-H(11B) | 0.9500     | Cu(1B)-Ti(1)   | 3.002(4)   |
| C(12B)-C(13B) | 1.3900     | C(25B)-O(11B)  | 1.21(5)    |
| C(12B)-H(12B) | 0.9500     | C(25B)-O(12B)  | 1.40(6)    |
| C(13B)-C(14B) | 1.3900     | C(25B)-C(26B)  | 1.470(16)  |
| C(13B)-H(13B) | 0.9500     | C(26B)-C(27B)  | 1.3900     |
| C(14B)-C(15B) | 1.3900     | C(26B)-C(31B)  | 1.3900     |
| C(14B)-H(14B) | 0.9500     | C(27B)-C(28B)  | 1.3900     |
| C(15B)-C(16B) | 1.5120     | C(27B)-H(27B)  | 0.9500     |
| C(16B)-H(16D) | 0.9800     | C(28B)-C(29B)  | 1.3900     |
| C(16B)-H(16E) | 0.9800     | C(28B)-H(28B)  | 0.9500     |
| C(16B)-H(16F) | 0.9800     | C(29B)-C(30B)  | 1.3900     |
| C(17)-O(8)#1  | 1.241(3)   | C(29B)-H(29B)  | 0.9500     |
| C(17)-O(10)   | 1.277(3)   | C(30B)-C(31B)  | 1.3900     |
| C(17)-C(18)   | 1.5109     | C(30B)-H(30B)  | 0.9500     |
| C(18)-C(19)   | 1.3830     | C(31B)-C(32B)  | 1.515(8)   |
| C(18)-C(23)   | 1.393(4)   | C(32B)-H(32D)  | 0.9800     |
| C(19)-C(20)   | 1.392(6)   | C(32B)-H(32E)  | 0.9800     |
| C(19)-H(19)   | 0.9500     | C(32B)-H(32F)  | 0.9800     |
| C(20)-C(21)   | 1.375(10)  | O(3)-Cu(1)#2   | 1.9320(12) |
| C(20)-H(20)   | 0.9500     | O(3)-Cu(1)#1   | 1.9320(12) |
| C(21)-C(22)   | 1.368(9)   | O(3)-Cu(1B)#2  | 2.225(5)   |
| C(21)-H(21)   | 0.9500     | O(3)-Cu(1B)#1  | 2.225(5)   |
| C(22)-C(23)   | 1.406(6)   | O(3)-H(3)      | 0.83(2)    |
| C(22)-H(22)   | 0.9500     | Ti(2)-O(5)     | 1.7958(19) |
| C(23)-C(24)   | 1.457(6)   | Ti(2)-O(6)#1   | 1.8554(18) |
| C(24)-H(24A)  | 0.9800     | Ti(2)-O(6)     | 1.9150(18) |
| C(24)-H(24B)  | 0.9800     | Ti(2)-O(10)    | 2.029(2)   |
| C(24)-H(24C)  | 0.9800     | Ti(2)-O(2)     | 2.0319(19) |
| Cu(1)-O(11)   | 1.931(3)   | Ti(2)-O(9)     | 2.1840(19) |
| Cu(1)-O(3)    | 1.9320(12) | Ti(2)-Cu(2)    | 2.9499(6)  |
| Cu(1)-O(1)    | 1.962(2)   | Ti(2)-Ti(1)    | 3.3835(8)  |
| Cu(1)-N(1)    | 2.032(3)   | Ti(1)-O(5)#2   | 1.8677(19) |
| C(25)-O(11)   | 1.259(6)   | Ti(1)-O(5)#1   | 1.8677(19) |
| C(25)-O(12)   | 1.263(6)   | Ti(1)-O(5)     | 1.8677(19) |
| C(25)-C(26)   | 1.488(4)   | Ti(1)-O(1)#2   | 2.078(2)   |
| C(26)-C(27)   | 1.3900     | Ti(1)-O(1)     | 2.078(2)   |
| C(26)-C(31)   | 1.3900     | Ti(1)-O(1)#1   | 2.078(2)   |
| C(27)-C(28)   | 1.3900     | Ti(1)-Cu(1B)#2 | 3.002(4)   |
| C(27)-H(27)   | 0.9500     | Ti(1)-Cu(1B)#1 | 3.002(4)   |

|                       |             |                           |           |
|-----------------------|-------------|---------------------------|-----------|
| Ti (1) -Ti (2) #1     | 3.3835 (8)  | N (2) -C (8) -H (8A)      | 109.5     |
| Ti (1) -Ti (2) #2     | 3.3835 (8)  | N (2) -C (8) -H (8B)      | 109.5     |
| Cu (2) -O (6)         | 1.9242 (17) | H (8A) -C (8) -H (8B)     | 109.5     |
| Cu (2) -O (2)         | 1.9688 (19) | N (2) -C (8) -H (8C)      | 109.5     |
| Cu (2) -O (7)         | 1.976 (2)   | H (8A) -C (8) -H (8C)     | 109.5     |
| Cu (2) -N (2)         | 2.029 (2)   | H (8B) -C (8) -H (8C)     | 109.5     |
| Cu (2) -O (8)         | 2.203 (2)   | O (9) -C (9) -O (7) #1    | 127.0 (3) |
| O (1) -Cu (1B) #2     | 2.165 (5)   | O (9) -C (9) -C (10B)     | 122.7 (6) |
| O (6) -Ti (2) #2      | 1.8554 (17) | O (7) #1 -C (9) -C (10B)  | 107.4 (6) |
| O (7) -C (9) #2       | 1.267 (3)   | O (9) -C (9) -C (10)      | 116.6 (2) |
| O (8) -C (17) #2      | 1.24 (2)    | O (7) #1 -C (9) -C (10)   | 116.4 (2) |
|                       |             | C (15) -C (10) -C (11)    | 120.3 (3) |
| O (1) -C (1) -C (2)   | 107.8 (3)   | C (15) -C (10) -C (9)     | 122.6 (3) |
| O (1) -C (1) -H (1A)  | 110.2       | C (11) -C (10) -C (9)     | 117.1 (3) |
| C (2) -C (1) -H (1A)  | 110.2       | C (12) -C (11) -C (10)    | 120.9 (4) |
| O (1) -C (1) -H (1B)  | 110.2       | C (12) -C (11) -H (11)    | 119.5     |
| C (2) -C (1) -H (1B)  | 110.2       | C (10) -C (11) -H (11)    | 119.5     |
| H (1A) -C (1) -H (1B) | 108.5       | C (11) -C (12) -C (13)    | 118.7 (4) |
| N (1) -C (2) -C (1)   | 109.0 (3)   | C (11) -C (12) -H (12)    | 120.6     |
| N (1) -C (2) -H (2A)  | 109.9       | C (13) -C (12) -H (12)    | 120.6     |
| C (1) -C (2) -H (2A)  | 109.9       | C (14) -C (13) -C (12)    | 120.6 (4) |
| N (1) -C (2) -H (2B)  | 109.9       | C (14) -C (13) -H (13)    | 119.7     |
| C (1) -C (2) -H (2B)  | 109.9       | C (12) -C (13) -H (13)    | 119.7     |
| H (2A) -C (2) -H (2B) | 108.3       | C (13) -C (14) -C (15)    | 121.7 (4) |
| N (1) -C (3) -H (3A)  | 109.5       | C (13) -C (14) -H (14)    | 119.1     |
| N (1) -C (3) -H (3B)  | 109.5       | C (15) -C (14) -H (14)    | 119.1     |
| H (3A) -C (3) -H (3B) | 109.5       | C (10) -C (15) -C (14)    | 117.6 (4) |
| N (1) -C (3) -H (3C)  | 109.5       | C (10) -C (15) -C (16)    | 121.9 (3) |
| H (3A) -C (3) -H (3C) | 109.5       | C (14) -C (15) -C (16)    | 120.5 (3) |
| H (3B) -C (3) -H (3C) | 109.5       | C (11B) -C (10B) -C (15B) | 120.0     |
| N (1) -C (4) -H (4A)  | 109.5       | C (11B) -C (10B) -C (9)   | 131.9 (3) |
| N (1) -C (4) -H (4B)  | 109.5       | C (15B) -C (10B) -C (9)   | 108.1 (3) |
| H (4A) -C (4) -H (4B) | 109.5       | C (10B) -C (11B) -C (12B) | 120.0     |
| N (1) -C (4) -H (4C)  | 109.5       | C (10B) -C (11B) -H (11B) | 120.0     |
| H (4A) -C (4) -H (4C) | 109.5       | C (12B) -C (11B) -H (11B) | 120.0     |
| H (4B) -C (4) -H (4C) | 109.5       | C (13B) -C (12B) -C (11B) | 120.0     |
| O (2) -C (5) -C (6)   | 107.6 (2)   | C (13B) -C (12B) -H (12B) | 120.0     |
| O (2) -C (5) -H (5A)  | 110.2       | C (11B) -C (12B) -H (12B) | 120.0     |
| C (6) -C (5) -H (5A)  | 110.2       | C (14B) -C (13B) -C (12B) | 120.0     |
| O (2) -C (5) -H (5B)  | 110.2       | C (14B) -C (13B) -H (13B) | 120.0     |
| C (6) -C (5) -H (5B)  | 110.2       | C (12B) -C (13B) -H (13B) | 120.0     |
| H (5A) -C (5) -H (5B) | 108.5       | C (13B) -C (14B) -C (15B) | 120.0     |
| N (2) -C (6) -C (5)   | 110.0 (2)   | C (13B) -C (14B) -H (14B) | 120.0     |
| N (2) -C (6) -H (6A)  | 109.7       | C (15B) -C (14B) -H (14B) | 120.0     |
| C (5) -C (6) -H (6A)  | 109.7       | C (14B) -C (15B) -C (10B) | 120.0     |
| N (2) -C (6) -H (6B)  | 109.7       | C (14B) -C (15B) -C (16B) | 119.4     |
| C (5) -C (6) -H (6B)  | 109.7       | C (10B) -C (15B) -C (16B) | 120.4     |
| H (6A) -C (6) -H (6B) | 108.2       | C (15B) -C (16B) -H (16D) | 109.5     |
| N (2) -C (7) -H (7A)  | 109.5       | C (15B) -C (16B) -H (16E) | 109.5     |
| N (2) -C (7) -H (7B)  | 109.5       | H (16D) -C (16B) -H (16E) | 109.5     |
| H (7A) -C (7) -H (7B) | 109.5       | C (15B) -C (16B) -H (16F) | 109.5     |
| N (2) -C (7) -H (7C)  | 109.5       | H (16D) -C (16B) -H (16F) | 109.5     |
| H (7A) -C (7) -H (7C) | 109.5       | H (16E) -C (16B) -H (16F) | 109.5     |
| H (7B) -C (7) -H (7C) | 109.5       | O (8) #1 -C (17) -O (10)  | 126.1 (2) |

|                     |            |                          |            |
|---------------------|------------|--------------------------|------------|
| O(8) #1-C(17)-C(18) | 118.9(2)   | O(1)-Cu(1B)-O(11B)       | 174.2(9)   |
| O(10)-C(17)-C(18)   | 114.91(19) | O(1)-Cu(1B)-N(1)         | 91.04(19)  |
| C(19)-C(18)-C(23)   | 120.4(2)   | O(11B)-Cu(1B)-N(1)       | 84.2(7)    |
| C(19)-C(18)-C(17)   | 116.9      | O(1)-Cu(1B)-O(1) #1      | 85.66(19)  |
| C(23)-C(18)-C(17)   | 122.7(2)   | O(11B)-Cu(1B)-O(1) #1    | 100.2(8)   |
| C(18)-C(19)-C(20)   | 121.3(4)   | N(1)-Cu(1B)-O(1) #1      | 140.9(3)   |
| C(18)-C(19)-H(19)   | 119.4      | O(1)-Cu(1B)-O(3)         | 83.49(18)  |
| C(20)-C(19)-H(19)   | 119.4      | O(11B)-Cu(1B)-O(3)       | 98.1(9)    |
| C(21)-C(20)-C(19)   | 118.5(6)   | N(1)-Cu(1B)-O(3)         | 141.4(3)   |
| C(21)-C(20)-H(20)   | 120.7      | O(1) #1-Cu(1B)-O(3)      | 76.95(14)  |
| C(19)-C(20)-H(20)   | 120.7      | O(1)-Cu(1B)-Ti(1)        | 43.09(11)  |
| C(22)-C(21)-C(20)   | 120.7(4)   | O(11B)-Cu(1B)-Ti(1)      | 142.5(9)   |
| C(22)-C(21)-H(21)   | 119.7      | N(1)-Cu(1B)-Ti(1)        | 116.33(19) |
| C(20)-C(21)-H(21)   | 119.7      | O(1) #1-Cu(1B)-Ti(1)     | 43.81(9)   |
| C(21)-C(22)-C(23)   | 121.7(5)   | O(3)-Cu(1B)-Ti(1)        | 84.78(13)  |
| C(21)-C(22)-H(22)   | 119.1      | O(11B)-C(25B)-O(12B)     | 117(3)     |
| C(23)-C(22)-H(22)   | 119.1      | O(11B)-C(25B)-C(26B)     | 115(4)     |
| C(18)-C(23)-C(22)   | 117.3(4)   | O(12B)-C(25B)-C(26B)     | 128(4)     |
| C(18)-C(23)-C(24)   | 124.3(3)   | C(25B)-O(11B)-Cu(1B)     | 133(2)     |
| C(22)-C(23)-C(24)   | 118.3(4)   | C(27B)-C(26B)-C(31B)     | 120.0      |
| C(23)-C(24)-H(24A)  | 109.5      | C(27B)-C(26B)-C(25B)     | 110.9(19)  |
| C(23)-C(24)-H(24B)  | 109.5      | C(31B)-C(26B)-C(25B)     | 129.0(19)  |
| H(24A)-C(24)-H(24B) | 109.5      | C(26B)-C(27B)-C(28B)     | 120.0      |
| C(23)-C(24)-H(24C)  | 109.5      | C(26B)-C(27B)-H(27B)     | 120.0      |
| H(24A)-C(24)-H(24C) | 109.5      | C(28B)-C(27B)-H(27B)     | 120.0      |
| H(24B)-C(24)-H(24C) | 109.5      | C(27B)-C(28B)-C(29B)     | 120.0      |
| O(11)-Cu(1)-O(3)    | 93.98(12)  | C(27B)-C(28B)-H(28B)     | 120.0      |
| O(11)-Cu(1)-O(1)    | 171.29(12) | C(29B)-C(28B)-H(28B)     | 120.0      |
| O(3)-Cu(1)-O(1)     | 89.10(10)  | C(30B)-C(29B)-C(28B)     | 120.0      |
| O(11)-Cu(1)-N(1)    | 90.60(12)  | C(30B)-C(29B)-H(29B)     | 120.0      |
| O(3)-Cu(1)-N(1)     | 175.41(12) | C(28B)-C(29B)-H(29B)     | 120.0      |
| O(1)-Cu(1)-N(1)     | 86.32(10)  | C(31B)-C(30B)-C(29B)     | 120.0      |
| O(11)-C(25)-O(12)   | 127.3(4)   | C(31B)-C(30B)-H(30B)     | 120.0      |
| O(11)-C(25)-C(26)   | 113.6(4)   | C(29B)-C(30B)-H(30B)     | 120.0      |
| O(12)-C(25)-C(26)   | 119.1(4)   | C(30B)-C(31B)-C(26B)     | 120.0      |
| C(25)-O(11)-Cu(1)   | 124.4(3)   | C(30B)-C(31B)-C(32B)     | 120.0(8)   |
| C(27)-C(26)-C(31)   | 120.0      | C(26B)-C(31B)-C(32B)     | 120.0(8)   |
| C(27)-C(26)-C(25)   | 119.8(3)   | C(31B)-C(32B)-H(32D)     | 109.5      |
| C(31)-C(26)-C(25)   | 120.2(3)   | C(31B)-C(32B)-H(32E)     | 109.5      |
| C(26)-C(27)-C(28)   | 120.0      | H(32D)-C(32B)-H(32E)     | 109.5      |
| C(26)-C(27)-H(27)   | 120.0      | C(31B)-C(32B)-H(32F)     | 109.5      |
| C(28)-C(27)-H(27)   | 120.0      | H(32D)-C(32B)-H(32F)     | 109.5      |
| C(29)-C(28)-C(27)   | 120.0      | H(32E)-C(32B)-H(32F)     | 109.5      |
| C(29)-C(28)-H(28)   | 120.0      | Cu(1) #2-O(3)-Cu(1) #1   | 109.55(10) |
| C(27)-C(28)-H(28)   | 120.0      | Cu(1) #2-O(3)-Cu(1)      | 109.55(10) |
| C(30)-C(29)-C(28)   | 120.0      | Cu(1) #1-O(3)-Cu(1)      | 109.55(10) |
| C(30)-C(29)-H(29)   | 120.0      | Cu(1) #1-O(3)-Cu(1B) #2  | 111.57(16) |
| C(28)-C(29)-H(29)   | 120.0      | Cu(1)-O(3)-Cu(1B) #2     | 92.02(15)  |
| C(31)-C(30)-C(29)   | 120.0      | Cu(1) #2-O(3)-Cu(1B) #1  | 92.02(15)  |
| C(31)-C(30)-H(30)   | 120.0      | Cu(1)-O(3)-Cu(1B) #1     | 111.57(16) |
| C(29)-C(30)-H(30)   | 120.0      | Cu(1B) #2-O(3)-Cu(1B) #1 | 92.95(18)  |
| C(30)-C(31)-C(26)   | 120.0      | Cu(1) #2-O(3)-Cu(1B)     | 111.57(16) |
| C(30)-C(31)-C(32)   | 118.9(3)   | Cu(1) #1-O(3)-Cu(1B)     | 92.02(15)  |
| C(26)-C(31)-C(32)   | 121.0(3)   | Cu(1B) #2-O(3)-Cu(1B)    | 92.95(18)  |

|                       |             |                         |            |
|-----------------------|-------------|-------------------------|------------|
| Cu(1B)#1-O(3)-Cu(1B)  | 92.95(18)   | O(1)-Ti(1)-Cu(1B)#2     | 46.17(10)  |
| Cu(1)#2-O(3)-H(3)     | 109.40(10)  | O(1)#1-Ti(1)-Cu(1B)#2   | 87.84(11)  |
| Cu(1)#1-O(3)-H(3)     | 109.40(10)  | O(5)#2-Ti(1)-Cu(1B)#1   | 139.55(10) |
| Cu(1)-O(3)-H(3)       | 109.40(10)  | O(5)#1-Ti(1)-Cu(1B)#1   | 83.89(11)  |
| Cu(1B)#2-O(3)-H(3)    | 123.15(13)  | O(5)-Ti(1)-Cu(1B)#1     | 125.44(10) |
| Cu(1B)#1-O(3)-H(3)    | 123.15(13)  | O(1)#2-Ti(1)-Cu(1B)#1   | 46.17(10)  |
| Cu(1B)-O(3)-H(3)      | 123.15(13)  | O(1)-Ti(1)-Cu(1B)#1     | 87.84(11)  |
| O(5)-Ti(2)-O(6)#1     | 95.75(8)    | O(1)#1-Ti(1)-Cu(1B)#1   | 37.64(10)  |
| O(5)-Ti(2)-O(6)       | 94.65(8)    | Cu(1B)#2-Ti(1)-Cu(1B)#1 | 65.03(14)  |
| O(6)#1-Ti(2)-O(6)     | 93.22(10)   | O(5)#2-Ti(1)-Cu(1B)     | 125.44(10) |
| O(5)-Ti(2)-O(10)      | 92.97(9)    | O(5)#1-Ti(1)-Cu(1B)     | 139.55(10) |
| O(6)#1-Ti(2)-O(10)    | 97.66(8)    | O(5)-Ti(1)-Cu(1B)       | 83.89(11)  |
| O(6)-Ti(2)-O(10)      | 166.03(8)   | O(1)#2-Ti(1)-Cu(1B)     | 87.84(11)  |
| O(5)-Ti(2)-O(2)       | 99.76(8)    | O(1)-Ti(1)-Cu(1B)       | 37.64(10)  |
| O(6)#1-Ti(2)-O(2)     | 162.93(8)   | O(1)#1-Ti(1)-Cu(1B)     | 46.17(10)  |
| O(6)-Ti(2)-O(2)       | 78.54(8)    | Cu(1B)#2-Ti(1)-Cu(1B)   | 65.03(14)  |
| O(10)-Ti(2)-O(2)      | 88.64(8)    | Cu(1B)#1-Ti(1)-Cu(1B)   | 65.03(14)  |
| O(5)-Ti(2)-O(9)       | 175.49(8)   | O(5)#2-Ti(1)-Ti(2)#1    | 79.95(6)   |
| O(6)#1-Ti(2)-O(9)     | 83.38(7)    | O(5)#1-Ti(1)-Ti(2)#1    | 22.08(6)   |
| O(6)-Ti(2)-O(9)       | 89.82(8)    | O(5)-Ti(1)-Ti(2)#1      | 80.32(6)   |
| O(10)-Ti(2)-O(9)      | 82.77(8)    | O(1)#2-Ti(1)-Ti(2)#1    | 105.30(6)  |
| O(2)-Ti(2)-O(9)       | 81.69(8)    | O(1)-Ti(1)-Ti(2)#1      | 166.19(6)  |
| O(5)-Ti(2)-Cu(2)      | 111.27(6)   | O(1)#1-Ti(1)-Ti(2)#1    | 109.28(6)  |
| O(6)#1-Ti(2)-Cu(2)    | 125.00(6)   | Cu(1B)#2-Ti(1)-Ti(2)#1  | 138.30(7)  |
| O(6)-Ti(2)-Cu(2)      | 39.91(5)    | Cu(1B)#1-Ti(1)-Ti(2)#1  | 105.84(9)  |
| O(10)-Ti(2)-Cu(2)     | 126.16(6)   | Cu(1B)-Ti(1)-Ti(2)#1    | 151.29(9)  |
| O(2)-Ti(2)-Cu(2)      | 41.67(5)    | O(5)#2-Ti(1)-Ti(2)#2    | 22.08(6)   |
| O(9)-Ti(2)-Cu(2)      | 72.67(5)    | O(5)#1-Ti(1)-Ti(2)#2    | 80.32(6)   |
| O(5)-Ti(2)-Ti(1)      | 23.02(6)    | O(5)-Ti(1)-Ti(2)#2      | 79.95(6)   |
| O(6)#1-Ti(2)-Ti(1)    | 79.81(6)    | O(1)#2-Ti(1)-Ti(2)#2    | 109.28(6)  |
| O(6)-Ti(2)-Ti(1)      | 79.12(5)    | O(1)-Ti(1)-Ti(2)#2      | 105.30(6)  |
| O(10)-Ti(2)-Ti(1)     | 111.38(6)   | O(1)#1-Ti(1)-Ti(2)#2    | 166.19(6)  |
| O(2)-Ti(2)-Ti(1)      | 112.71(6)   | Cu(1B)#2-Ti(1)-Ti(2)#2  | 105.84(9)  |
| O(9)-Ti(2)-Ti(1)      | 159.25(5)   | Cu(1B)#1-Ti(1)-Ti(2)#2  | 151.29(9)  |
| Cu(2)-Ti(2)-Ti(1)     | 107.546(15) | Cu(1B)-Ti(1)-Ti(2)#2    | 138.30(7)  |
| O(5)#2-Ti(1)-O(5)#1   | 94.99(8)    | Ti(2)#1-Ti(1)-Ti(2)#2   | 61.631(18) |
| O(5)#2-Ti(1)-O(5)     | 94.99(8)    | O(5)#2-Ti(1)-Ti(2)      | 80.32(6)   |
| O(5)#1-Ti(1)-O(5)     | 94.99(8)    | O(5)#1-Ti(1)-Ti(2)      | 79.95(6)   |
| O(5)#2-Ti(1)-O(1)#2   | 93.42(8)    | O(5)-Ti(1)-Ti(2)        | 22.08(6)   |
| O(5)#1-Ti(1)-O(1)#2   | 88.42(8)    | O(1)#2-Ti(1)-Ti(2)      | 166.19(6)  |
| O(5)-Ti(1)-O(1)#2     | 170.62(9)   | O(1)-Ti(1)-Ti(2)        | 109.28(6)  |
| O(5)#2-Ti(1)-O(1)     | 88.42(8)    | O(1)#1-Ti(1)-Ti(2)      | 105.30(6)  |
| O(5)#1-Ti(1)-O(1)     | 170.62(9)   | Cu(1B)#2-Ti(1)-Ti(2)    | 151.29(10) |
| O(5)-Ti(1)-O(1)       | 93.42(8)    | Cu(1B)#1-Ti(1)-Ti(2)    | 138.30(7)  |
| O(1)#2-Ti(1)-O(1)     | 82.64(9)    | Cu(1B)-Ti(1)-Ti(2)      | 105.84(9)  |
| O(5)#2-Ti(1)-O(1)#1   | 170.62(9)   | Ti(2)#1-Ti(1)-Ti(2)     | 61.631(18) |
| O(5)#1-Ti(1)-O(1)#1   | 93.42(8)    | Ti(2)#2-Ti(1)-Ti(2)     | 61.631(18) |
| O(5)-Ti(1)-O(1)#1     | 88.42(8)    | O(6)-Cu(2)-O(2)         | 79.89(8)   |
| O(1)#2-Ti(1)-O(1)#1   | 82.64(9)    | O(6)-Cu(2)-O(7)         | 94.67(8)   |
| O(1)-Ti(1)-O(1)#1     | 82.64(9)    | O(2)-Cu(2)-O(7)         | 157.78(9)  |
| O(5)#2-Ti(1)-Cu(1B)#2 | 83.89(11)   | O(6)-Cu(2)-N(2)         | 160.35(9)  |
| O(5)#1-Ti(1)-Cu(1B)#2 | 125.44(10)  | O(2)-Cu(2)-N(2)         | 85.77(9)   |
| O(5)-Ti(1)-Cu(1B)#2   | 139.55(10)  | O(7)-Cu(2)-N(2)         | 93.57(10)  |
| O(1)#2-Ti(1)-Cu(1B)#2 | 37.64(10)   | O(6)-Cu(2)-O(8)         | 98.51(8)   |



|                  |            |                      |            |
|------------------|------------|----------------------|------------|
| O(2)-Cu(2)-O(8)  | 108.17(8)  | C(6)-N(2)-Cu(2)      | 104.52(18) |
| O(7)-Cu(2)-O(8)  | 93.90(9)   | C(1)-O(1)-Cu(1B)     | 109.6(2)   |
| N(2)-Cu(2)-O(8)  | 98.69(9)   | C(1)-O(1)-Cu(1)      | 106.90(17) |
| O(6)-Cu(2)-Ti(2) | 39.68(5)   | C(1)-O(1)-Ti(1)      | 120.00(17) |
| O(2)-Cu(2)-Ti(2) | 43.33(5)   | Cu(1B)-O(1)-Ti(1)    | 99.27(18)  |
| O(7)-Cu(2)-Ti(2) | 122.75(6)  | Cu(1)-O(1)-Ti(1)     | 117.21(10) |
| N(2)-Cu(2)-Ti(2) | 121.94(8)  | C(1)-O(1)-Cu(1B)#2   | 127.1(2)   |
| O(8)-Cu(2)-Ti(2) | 119.37(6)  | Cu(1B)-O(1)-Cu(1B)#2 | 106.4(3)   |
| C(4)-N(1)-C(2)   | 112.0(3)   | Cu(1)-O(1)-Cu(1B)#2  | 93.01(15)  |
| C(4)-N(1)-C(3)   | 107.6(3)   | Ti(1)-O(1)-Cu(1B)#2  | 90.02(12)  |
| C(2)-N(1)-C(3)   | 109.7(3)   | C(5)-O(2)-Cu(2)      | 111.63(17) |
| C(4)-N(1)-Cu(1B) | 130.2(3)   | C(5)-O(2)-Ti(2)      | 131.14(18) |
| C(2)-N(1)-Cu(1B) | 98.1(2)    | Cu(2)-O(2)-Ti(2)     | 95.00(8)   |
| C(3)-N(1)-Cu(1B) | 97.5(3)    | Ti(2)-O(5)-Ti(1)     | 134.90(11) |
| C(4)-N(1)-Cu(1)  | 109.5(2)   | Ti(2)#2-O(6)-Ti(2)   | 133.68(10) |
| C(2)-N(1)-Cu(1)  | 106.7(2)   | Ti(2)#2-O(6)-Cu(2)   | 123.55(9)  |
| C(3)-N(1)-Cu(1)  | 111.3(2)   | Ti(2)-O(6)-Cu(2)     | 100.42(8)  |
| C(7)-N(2)-C(8)   | 109.5(3)   | C(9)#2-O(7)-Cu(2)    | 127.34(17) |
| C(7)-N(2)-C(6)   | 110.4(3)   | C(17)#2-O(8)-Cu(2)   | 122.1(5)   |
| C(8)-N(2)-C(6)   | 110.5(3)   | C(9)-O(9)-Ti(2)      | 132.55(18) |
| C(7)-N(2)-Cu(2)  | 114.4(2)   | C(17)-O(10)-Ti(2)    | 137.28(16) |
| C(8)-N(2)-Cu(2)  | 107.48(18) |                      |            |

Symmetry transformations used to generate equivalent atoms:

#1 -y+1,x-y,z      #2 -x+y+1,-x+1,z

Table 4. Anisotropic displacement parameters [ $\text{\AA}^2 \times 10^3$ ] for 06mz069m. The anisotropic displacement factor exponent takes the form:  $-2 \pi^2 [(h a^*)^2 U_{11} + \dots + 2 h k a^* b^* U_{12}]$

|       | U11   | U22   | U33   | U23    | U13    | U12   |
|-------|-------|-------|-------|--------|--------|-------|
| C(1)  | 36(2) | 32(2) | 36(2) | -3(1)  | 7(1)   | 6(1)  |
| C(2)  | 56(2) | 31(2) | 39(2) | 0(1)   | -2(2)  | 12(2) |
| C(3)  | 49(2) | 57(2) | 79(3) | 1(2)   | -11(2) | 29(2) |
| C(4)  | 51(2) | 39(2) | 47(2) | -11(1) | -1(2)  | 18(2) |
| C(5)  | 39(2) | 26(1) | 50(2) | 1(1)   | 1(1)   | 21(1) |
| C(6)  | 46(2) | 24(1) | 52(2) | -1(1)  | 2(1)   | 19(1) |
| C(7)  | 41(2) | 27(2) | 64(2) | 11(1)  | 3(2)   | 10(1) |
| C(8)  | 50(2) | 35(2) | 44(2) | 7(1)   | -2(1)  | 23(2) |
| C(9)  | 29(1) | 26(1) | 33(1) | -1(1)  | -5(1)  | 16(1) |
| C(10) | 36(2) | 21(1) | 34(2) | -1(1)  | -8(1)  | 11(1) |
| C(11) | 43(2) | 37(2) | 37(2) | 5(1)   | 1(1)   | 14(2) |
| C(12) | 64(3) | 52(2) | 47(2) | 10(2)  | 13(2)  | 17(2) |
| C(13) | 85(3) | 43(2) | 37(2) | 8(2)   | -5(2)  | 13(2) |
| C(14) | 74(3) | 38(2) | 43(2) | 3(2)   | -25(2) | 17(2) |

|         |         |         |         |         |         |         |
|---------|---------|---------|---------|---------|---------|---------|
| C (15)  | 48 (2)  | 27 (1)  | 41 (2)  | -2 (1)  | -18 (2) | 14 (1)  |
| C (16)  | 51 (2)  | 50 (2)  | 75 (3)  | 0 (2)   | -27 (2) | 29 (2)  |
| C (10B) | 36 (2)  | 21 (1)  | 34 (2)  | -1 (1)  | -8 (1)  | 11 (1)  |
| C (11B) | 43 (2)  | 37 (2)  | 37 (2)  | 5 (1)   | 1 (1)   | 14 (2)  |
| C (12B) | 64 (3)  | 52 (2)  | 47 (2)  | 10 (2)  | 13 (2)  | 17 (2)  |
| C (13B) | 85 (3)  | 43 (2)  | 37 (2)  | 8 (2)   | -5 (2)  | 13 (2)  |
| C (14B) | 74 (3)  | 38 (2)  | 43 (2)  | 3 (2)   | -25 (2) | 17 (2)  |
| C (15B) | 48 (2)  | 27 (1)  | 41 (2)  | -2 (1)  | -18 (2) | 14 (1)  |
| C (16B) | 51 (2)  | 50 (2)  | 75 (3)  | 0 (2)   | -27 (2) | 29 (2)  |
| C (17)  | 28 (1)  | 38 (2)  | 32 (1)  | 0 (1)   | 0 (1)   | 21 (1)  |
| C (18)  | 40 (2)  | 46 (2)  | 39 (2)  | 3 (1)   | 7 (1)   | 29 (1)  |
| C (19)  | 86 (3)  | 90 (3)  | 58 (2)  | -25 (2) | -8 (2)  | 63 (3)  |
| C (20)  | 155 (6) | 132 (6) | 71 (3)  | -29 (3) | 6 (4)   | 108 (5) |
| C (21)  | 118 (5) | 107 (5) | 107 (5) | 2 (4)   | 50 (4)  | 83 (4)  |
| C (22)  | 54 (2)  | 73 (3)  | 119 (4) | 30 (3)  | 43 (3)  | 45 (2)  |
| C (23)  | 37 (2)  | 47 (2)  | 68 (2)  | 20 (2)  | 20 (2)  | 26 (2)  |
| C (24)  | 33 (2)  | 48 (2)  | 113 (4) | 12 (2)  | -5 (2)  | 23 (2)  |
| Cu (1)  | 34 (1)  | 29 (1)  | 31 (1)  | 0 (1)   | 5 (1)   | 15 (1)  |
| C (25)  | 63 (3)  | 42 (2)  | 53 (3)  | 8 (2)   | 21 (2)  | 29 (2)  |
| O (11)  | 52 (2)  | 36 (1)  | 56 (2)  | -1 (1)  | 21 (1)  | 19 (1)  |
| O (12)  | 51 (1)  | 51 (1)  | 51 (1)  | -4 (1)  | 3 (1)   | 26 (1)  |
| C (26)  | 55 (2)  | 30 (2)  | 74 (3)  | -2 (2)  | 33 (2)  | 11 (2)  |
| C (27)  | 54 (3)  | 54 (3)  | 88 (4)  | -9 (3)  | 9 (3)   | 16 (2)  |
| C (28)  | 67 (3)  | 66 (3)  | 86 (4)  | -27 (3) | 13 (3)  | 22 (3)  |
| C (29)  | 63 (3)  | 48 (3)  | 107 (4) | -16 (3) | 34 (3)  | 18 (2)  |
| C (30)  | 49 (2)  | 40 (3)  | 93 (3)  | 5 (2)   | 25 (2)  | 14 (2)  |
| C (31)  | 60 (3)  | 34 (2)  | 82 (4)  | 13 (2)  | 22 (3)  | 13 (2)  |
| C (32)  | 74 (4)  | 88 (4)  | 84 (4)  | 18 (3)  | 19 (3)  | 44 (4)  |
| Cu (1B) | 34 (1)  | 29 (1)  | 31 (1)  | 0 (1)   | 5 (1)   | 15 (1)  |
| C (25B) | 63 (3)  | 42 (2)  | 53 (3)  | 8 (2)   | 21 (2)  | 29 (2)  |
| O (11B) | 52 (2)  | 36 (1)  | 56 (2)  | -1 (1)  | 21 (1)  | 19 (1)  |
| O (12B) | 51 (1)  | 51 (1)  | 51 (1)  | -4 (1)  | 3 (1)   | 26 (1)  |
| C (26B) | 55 (2)  | 30 (2)  | 74 (3)  | -2 (2)  | 33 (2)  | 11 (2)  |
| C (27B) | 54 (3)  | 54 (3)  | 88 (4)  | -9 (3)  | 9 (3)   | 16 (2)  |
| C (28B) | 67 (3)  | 66 (3)  | 86 (4)  | -27 (3) | 13 (3)  | 22 (3)  |
| C (29B) | 63 (3)  | 48 (3)  | 107 (4) | -16 (3) | 34 (3)  | 18 (2)  |
| C (30B) | 49 (2)  | 40 (3)  | 93 (3)  | 5 (2)   | 25 (2)  | 14 (2)  |
| C (31B) | 60 (3)  | 34 (2)  | 82 (4)  | 13 (2)  | 22 (3)  | 13 (2)  |
| C (32B) | 74 (4)  | 88 (4)  | 84 (4)  | 18 (3)  | 19 (3)  | 44 (4)  |
| O (3)   | 37 (1)  | 37 (1)  | 26 (2)  | 0       | 0       | 18 (1)  |
| Ti (2)  | 21 (1)  | 20 (1)  | 28 (1)  | -2 (1)  | -2 (1)  | 11 (1)  |
| Ti (1)  | 29 (1)  | 29 (1)  | 25 (1)  | 0       | 0       | 14 (1)  |
| Cu (2)  | 26 (1)  | 20 (1)  | 33 (1)  | 2 (1)   | 0 (1)   | 11 (1)  |
| N (1)   | 40 (1)  | 31 (1)  | 45 (2)  | -5 (1)  | -1 (1)  | 15 (1)  |
| N (2)   | 35 (1)  | 24 (1)  | 45 (1)  | 3 (1)   | 1 (1)   | 14 (1)  |
| O (1)   | 30 (1)  | 29 (1)  | 29 (1)  | -2 (1)  | 1 (1)   | 11 (1)  |
| O (2)   | 29 (1)  | 22 (1)  | 36 (1)  | -3 (1)  | -3 (1)  | 14 (1)  |
| O (5)   | 27 (1)  | 26 (1)  | 27 (1)  | -2 (1)  | 0 (1)   | 14 (1)  |
| O (6)   | 21 (1)  | 20 (1)  | 29 (1)  | 1 (1)   | 0 (1)   | 10 (1)  |
| O (7)   | 34 (1)  | 27 (1)  | 37 (1)  | 7 (1)   | 8 (1)   | 15 (1)  |
| O (8)   | 28 (1)  | 27 (1)  | 44 (1)  | -1 (1)  | -4 (1)  | 11 (1)  |
| O (9)   | 29 (1)  | 24 (1)  | 32 (1)  | -1 (1)  | -6 (1)  | 13 (1)  |
| O (10)  | 28 (1)  | 31 (1)  | 43 (1)  | -6 (1)  | -3 (1)  | 18 (1)  |

---

Table 5. Hydrogen coordinates ( $\times 10^4$ ) and isotropic displacement parameters ( $\text{\AA}^2 \times 10^3$ ) for 06mz069m.

|        | x    | y    | z    | U(eq) |
|--------|------|------|------|-------|
| H(1A)  | 8048 | 4988 | 6402 | 48    |
| H(1B)  | 8304 | 5283 | 6701 | 48    |
| H(2A)  | 7733 | 5994 | 6529 | 55    |
| H(2B)  | 6978 | 5203 | 6429 | 55    |
| H(3A)  | 6344 | 5832 | 6697 | 91    |
| H(3B)  | 6006 | 5337 | 6964 | 91    |
| H(3C)  | 5875 | 4894 | 6687 | 91    |
| H(4A)  | 7529 | 6485 | 6944 | 72    |
| H(4B)  | 8013 | 6057 | 7019 | 72    |
| H(4C)  | 7252 | 5883 | 7187 | 72    |
| H(5A)  | 6563 | 6034 | 5907 | 43    |
| H(5B)  | 6417 | 5669 | 5614 | 43    |
| H(6A)  | 7453 | 6960 | 5580 | 48    |
| H(6B)  | 7900 | 6841 | 5826 | 48    |
| H(7A)  | 8833 | 7391 | 5370 | 71    |
| H(7B)  | 9081 | 6732 | 5350 | 71    |
| H(7C)  | 9048 | 7082 | 5633 | 71    |
| H(8A)  | 7867 | 5954 | 5104 | 63    |
| H(8B)  | 7603 | 6594 | 5149 | 63    |
| H(8C)  | 7042 | 5706 | 5241 | 63    |
| H(11)  | 6823 | 4297 | 5013 | 50    |
| H(12)  | 7095 | 4606 | 4565 | 71    |
| H(13)  | 6153 | 4668 | 4298 | 76    |
| H(14)  | 4966 | 4405 | 4472 | 68    |
| H(16A) | 4405 | 4119 | 5141 | 85    |
| H(16B) | 3979 | 3385 | 4945 | 85    |
| H(16C) | 4143 | 4230 | 4852 | 85    |
| H(11B) | 4359 | 4005 | 5042 | 50    |
| H(12B) | 4444 | 4502 | 4615 | 71    |
| H(13B) | 5595 | 4942 | 4368 | 76    |
| H(14B) | 6661 | 4885 | 4548 | 68    |
| H(16D) | 6600 | 3757 | 5057 | 85    |
| H(16E) | 7043 | 4645 | 5160 | 85    |
| H(16F) | 7203 | 4449 | 4867 | 85    |
| H(19)  | 5127 | 4814 | 6335 | 84    |
| H(20)  | 4550 | 5396 | 6585 | 124   |
| H(21)  | 3273 | 5097 | 6485 | 119   |
| H(22)  | 2606 | 4279 | 6137 | 91    |
| H(24A) | 2725 | 2961 | 5862 | 95    |
| H(24B) | 3347 | 3592 | 5660 | 95    |
| H(24C) | 2603 | 3656 | 5752 | 95    |
| H(27)  | 5695 | 4236 | 7814 | 85    |
| H(28)  | 5049 | 4661 | 8100 | 94    |
| H(29)  | 4001 | 4795 | 7946 | 92    |
| H(30)  | 3598 | 4503 | 7505 | 77    |
| H(32A) | 3715 | 4126 | 7078 | 120   |

|         |      |      |          |     |
|---------|------|------|----------|-----|
| H (32B) | 3853 | 3392 | 7096     | 120 |
| H (32C) | 4539 | 4220 | 6990     | 120 |
| H (27B) | 4252 | 3846 | 6927     | 85  |
| H (28B) | 3342 | 4268 | 6987     | 94  |
| H (29B) | 3238 | 4756 | 7398     | 92  |
| H (30B) | 4045 | 4823 | 7749     | 77  |
| H (32D) | 5602 | 4399 | 7708     | 120 |
| H (32E) | 4836 | 3936 | 7889     | 120 |
| H (32F) | 5296 | 4874 | 7881     | 120 |
| H (3)   | 6667 | 3333 | 7280 (4) | 40  |

---
